# Supplementary material
Source: publisher figshare collection journal article supplement (https://acs.figshare.com/ndownloader/files/10684363)
Supplement: Supplementary file 1 [file 10684363]

## Coculture of two Developmental Stages of a Marine-derived *Aspergillus alliaceus*

### Results in the Production of the Cytotoxic Bianthrone Allianthrone A

P. E. Mandelare, D. A. Adpressa, E. N. Kaweesa,

L. N. Zakharov, S. Loesgen\*

Content:

|            | NMR Spectra                                                                                         | Page# |
|------------|-----------------------------------------------------------------------------------------------------|-------|
| Figure S1  | $^1\text{H}$ of compound <b>1</b> in chloroform- <i>d</i>                                           | S4    |
| Figure S2  | $^1\text{H}$ - $^1\text{H}$ COSY of compound <b>1</b> in chloroform- <i>d</i>                       | S5    |
| Figure S3  | $^1\text{H}$ - $^{13}\text{C}$ HSQC of compound <b>1</b> in chloroform- <i>d</i>                    | S6    |
| Figure S4  | $^1\text{H}$ - $^{13}\text{C}$ HMBC of compound <b>1</b> in chloroform- <i>d</i> , 8 Hz optimized   | S7    |
| Table S1   | Chemical shifts for compounds <b>2</b> and <b>3</b> in chloroform- <i>d</i>                         | S8    |
| Figure S5  | $^1\text{H}$ of compound <b>2</b> in chloroform- <i>d</i>                                           | S9    |
| Figure S6  | Crystal structure of compound <b>2</b>                                                              | S10   |
| Figure S7  | $^1\text{H}$ of compound <b>3</b> in chloroform- <i>d</i>                                           | S11   |
| Figure S8  | $^1\text{H}$ - $^1\text{H}$ COSY of compound <b>3</b> in chloroform- <i>d</i>                       | S12   |
| Figure S9  | $^1\text{H}$ - $^{13}\text{C}$ HSQC of compound <b>3</b> in chloroform- <i>d</i>                    | S13   |
| Figure S10 | $^1\text{H}$ - $^{13}\text{C}$ HMBC of compound <b>3</b> in chloroform- <i>d</i> , 4 Hz optimized   | S14   |
| Figure S11 | $^1\text{H}$ - $^{13}\text{C}$ HMBC of compound <b>3</b> in chloroform- <i>d</i> , 8 Hz optimized   | S15   |
| Figure S12 | $^1\text{H}$ of compound <b>4</b> in acetonitrile- <i>d</i> <sub>3</sub>                            | S16   |
| Figure S13 | $^1\text{H}$ of compound <b>4</b> in acetonitrile- <i>d</i> <sub>3</sub> , 7.0 to 5.8 ppm expansion | S17   |
| Figure S14 | $^1\text{H}$ of compound <b>4</b> in acetonitrile- <i>d</i> <sub>3</sub> , 4.8 to 3.6 ppm expansion | S18   |
| Figure S15 | $^1\text{H}$ of compound <b>4</b> in acetonitrile- <i>d</i> <sub>3</sub> , 2.7 to 1.2 ppm expansion | S19   |
| Figure S16 | $^{13}\text{C}$ of compound <b>4</b> in acetonitrile- <i>d</i> <sub>3</sub>                         | S20   |
| Figure S17 | DEPT 135- $^{13}\text{C}$ of compound <b>4</b> in acetone- <i>d</i> <sub>3</sub>                    | S21   |
| Figure S18 | $^1\text{H}$ - $^1\text{H}$ COSY of compound <b>4</b> in acetone- <i>d</i> <sub>3</sub>             | S22   |

|            |                                                                                                                |     |
|------------|----------------------------------------------------------------------------------------------------------------|-----|
| Figure S19 | $^1\text{H}$ - $^{13}\text{C}$ HSQC of compound <b>4</b> in acetonitrile- $d_3$                                | S23 |
| Figure S20 | $^1\text{H}$ - $^{13}\text{C}$ HMBC of compound <b>4</b> in acetone- $d_3$ , 4 Hz optimized                    | S24 |
| Figure S21 | $^1\text{H}$ - $^{13}\text{C}$ HMBC of compound <b>4</b> in acetone- $d_3$ , 8 Hz optimized                    | S25 |
| Figure S22 | $^1\text{H}$ - $^{13}\text{C}$ HMBC of compound <b>4</b> in acetonitrile- $d_3$ , 4 Hz optimized               | S26 |
| Figure S23 | SEL-TOCSY of compound <b>4</b> in acetonitrile- $d_3$ of H-12                                                  | S27 |
| Figure S24 | SEL-TOCSY of compound <b>4</b> in acetonitrile- $d_3$ of H-11 and 12-OH                                        | S28 |
| Figure S25 | SEL-TOCSY of compound <b>4</b> in acetonitrile- $d_3$ of H-13                                                  | S29 |
| Figure S26 | $^1\text{H}$ of compound <b>5</b> in acetonitrile- $d_3$                                                       | S30 |
| Figure S27 | $^1\text{H}$ of compound <b>6</b> in acetonitrile- $d_3$                                                       | S31 |
| Figure S28 | $^{13}\text{C}$ of compound <b>5</b> in acetonitrile- $d_3$                                                    | S32 |
| Figure S29 | $^{13}\text{C}$ of compound <b>6</b> in acetonitrile- $d_3$                                                    | S33 |
| Figure S30 | $^1\text{H}$ - $^{13}\text{C}$ HSQC of compound <b>5</b> in acetonitrile- $d_3$                                | S34 |
| Figure S31 | $^1\text{H}$ - $^{13}\text{C}$ HSQC of compound <b>6</b> in acetonitrile- $d_3$                                | S35 |
| Figure S32 | $^1\text{H}$ - $^{13}\text{C}$ HMBC of compound <b>5</b> in acetonitrile- $d_3$ , 4 Hz optimized               | S36 |
| Figure S33 | $^1\text{H}$ - $^{13}\text{C}$ HMBC of compound <b>6</b> in acetonitrile- $d_3$ , 4 Hz optimized               | S37 |
| Figure S34 | $^{13}\text{C}$ - $^{35}\text{Cl}/^{37}\text{Cl}$ isotope shift of compounds <b>4-6</b> in acetonitrile- $d_3$ | S38 |
|            | <b>Cell viability assay</b>                                                                                    |     |
| Figure S35 | IC <sub>50</sub> curve of compounds <b>4-6</b> against SK-Mel 5 cell lines                                     | S39 |
| Figure S36 | IC <sub>50</sub> curve of compounds <b>4-6</b> against HCT-116 cell lines                                      | S40 |
| Figure S37 | IC <sub>50</sub> curve of compounds <b>4-6</b> against A549 cell lines                                         | S41 |
| Figure S38 | IC <sub>50</sub> curve of compounds <b>4-6</b> against PC3 cell lines                                          | S42 |
| Figure S39 | IC <sub>50</sub> curve of compounds <b>4-6</b> against MCF7 cell lines                                         | S43 |
|            | <b>Antimicrobial assay</b>                                                                                     |     |
| Figure S40 | Overall antimicrobial activity of compounds <b>1, 2</b> , and <b>4-6</b> in ethanol                            | S44 |
|            | <b><i>Aspergillus alliaceus</i> coculture study</b>                                                            |     |

|            |                                                                                               |     |
|------------|-----------------------------------------------------------------------------------------------|-----|
| Figure S41 | Visual of coculture experiments with <i>A. alliaceus</i> phenotypes                           | S45 |
| Figure S42 | Metabolite comparison of <i>A. alliaceus</i> phenotypes via LC/MS analysis                    | S46 |
| Figure S43 | Metabolite production plot of induced <i>A. alliaceus</i> after coculture experiment          | S47 |
| Figure S44 | Metabolite production plot of <i>A. alliaceus</i> phenotype coculture experiment              | S48 |
| Figure S45 | Metabolite production plot of <i>A. alliaceus</i> (sclerotia-forming phenotype)               | S49 |
| Figure S46 | Metabolite production plot of <i>A. alliaceus</i> (conidia-forming phenotype)                 | S50 |
| Figure S47 | Induction of conidia-forming <i>A. alliaceus</i> phenotype                                    | S51 |
| Figure S48 | Induction of sclerotia-forming <i>A. alliaceus</i> phenotype                                  | S52 |
|            | <b>DNA taxonomy of <i>A. alliaceus</i> developmental stages</b>                               |     |
| Figure S49 | Phylogenetic consensus tree of <i>A. alliaceus</i> phenotypes, Beta-Tubulin, CAM, ITS regions | S53 |
| Figure S50 | Consensus sequence of conidia-forming <i>A. alliaceus</i> Beta-Tubulin, CAM, ITS regions      | S54 |
| Figure S51 | Consensus sequence of sclerotia-forming <i>A. alliaceus</i> Beta-Tubulin, CAM, ITS regions    | S55 |
|            | <b>Biosynthetic proposal of compounds 2-6 from <i>A. alliaceus</i></b>                        |     |
| Figure S52 | Abbreviated biosynthetic proposal of compounds <b>2-6</b>                                     | S56 |
|            | References                                                                                    | S57 |

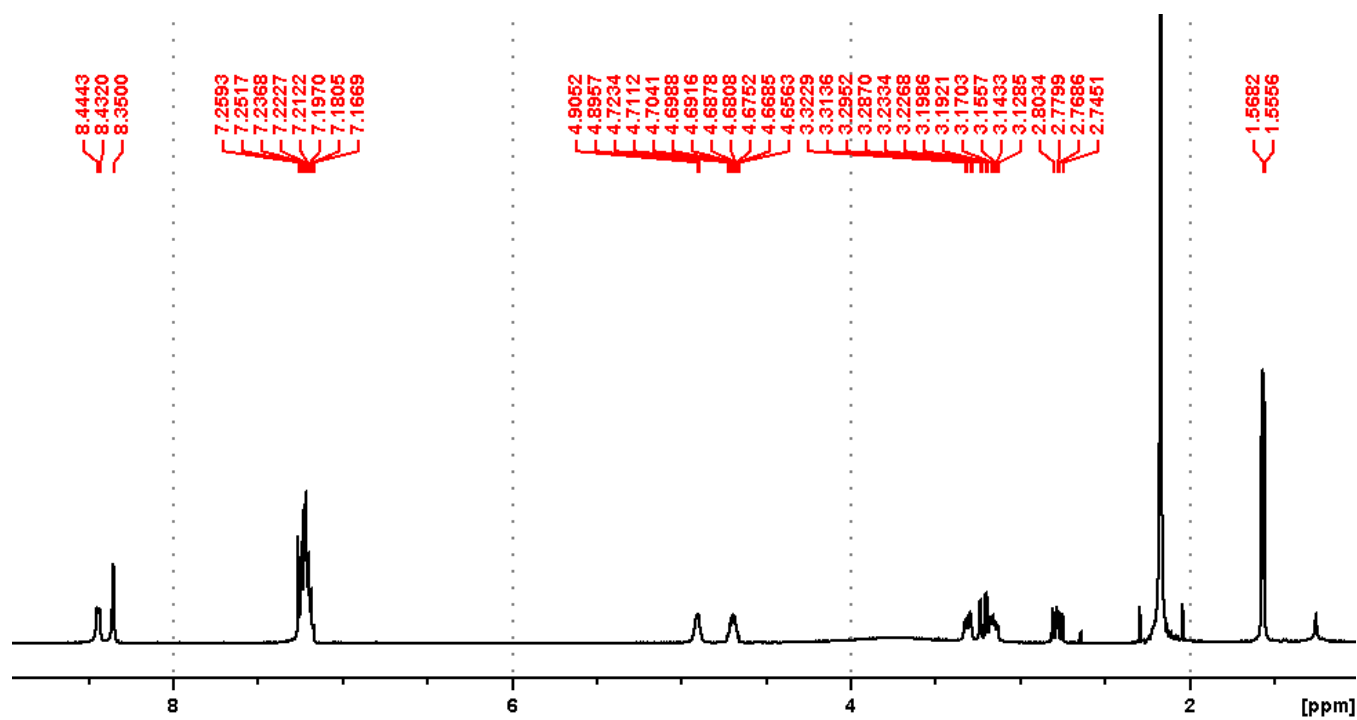

**Figure S1:**  $^1\text{H}$  NMR of compound **1** in chloroform-*d* at 500 MHz.

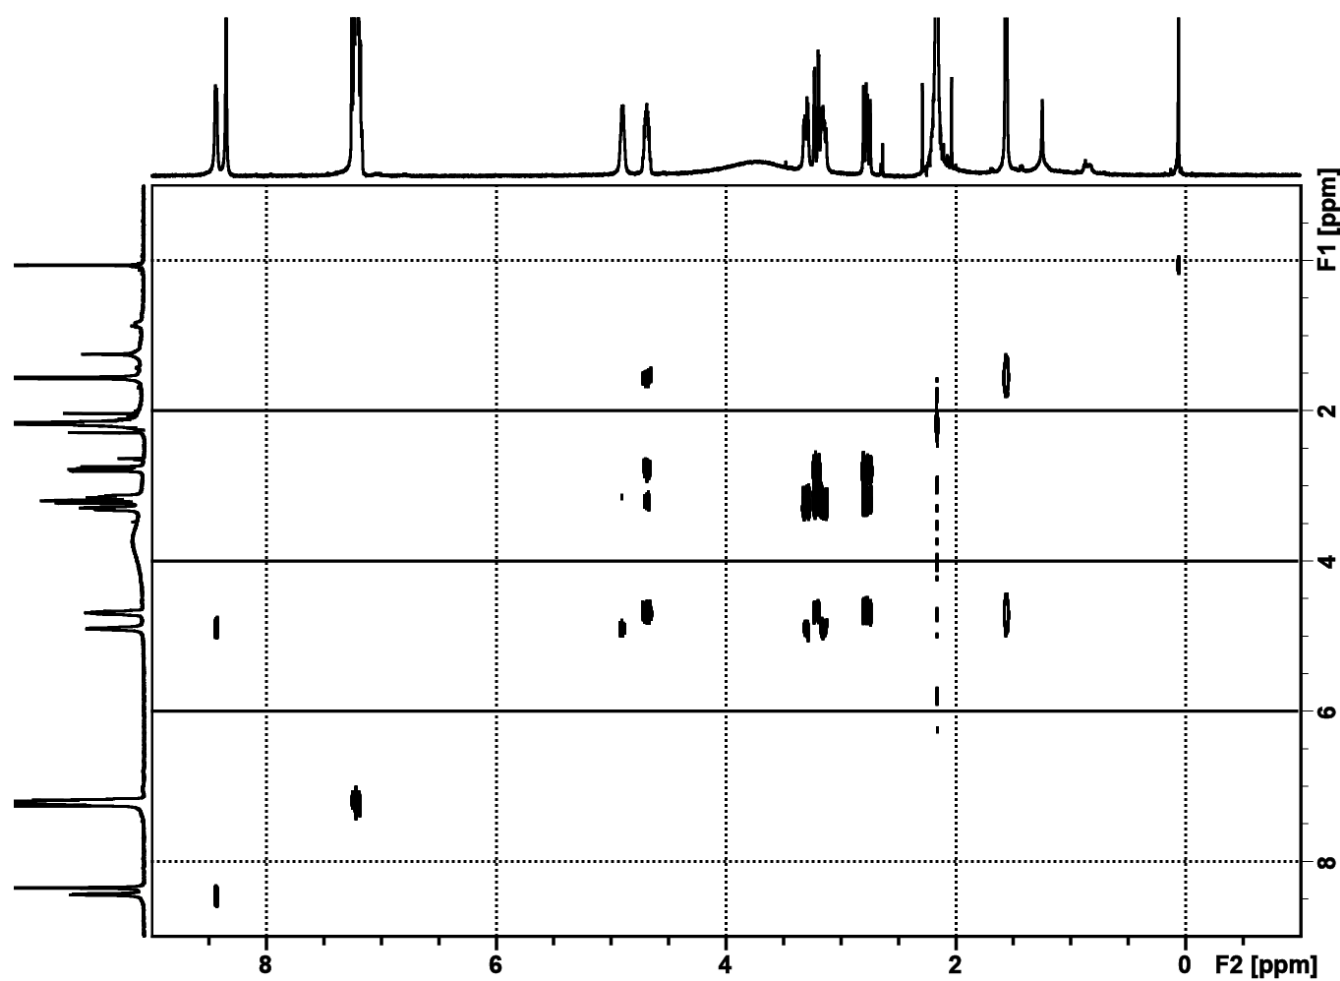

**Figure S2:**  $^1\text{H}$ - $^1\text{H}$  COSY NMR spectrum of compound **1** in chloroform-*d* at 500 MHz

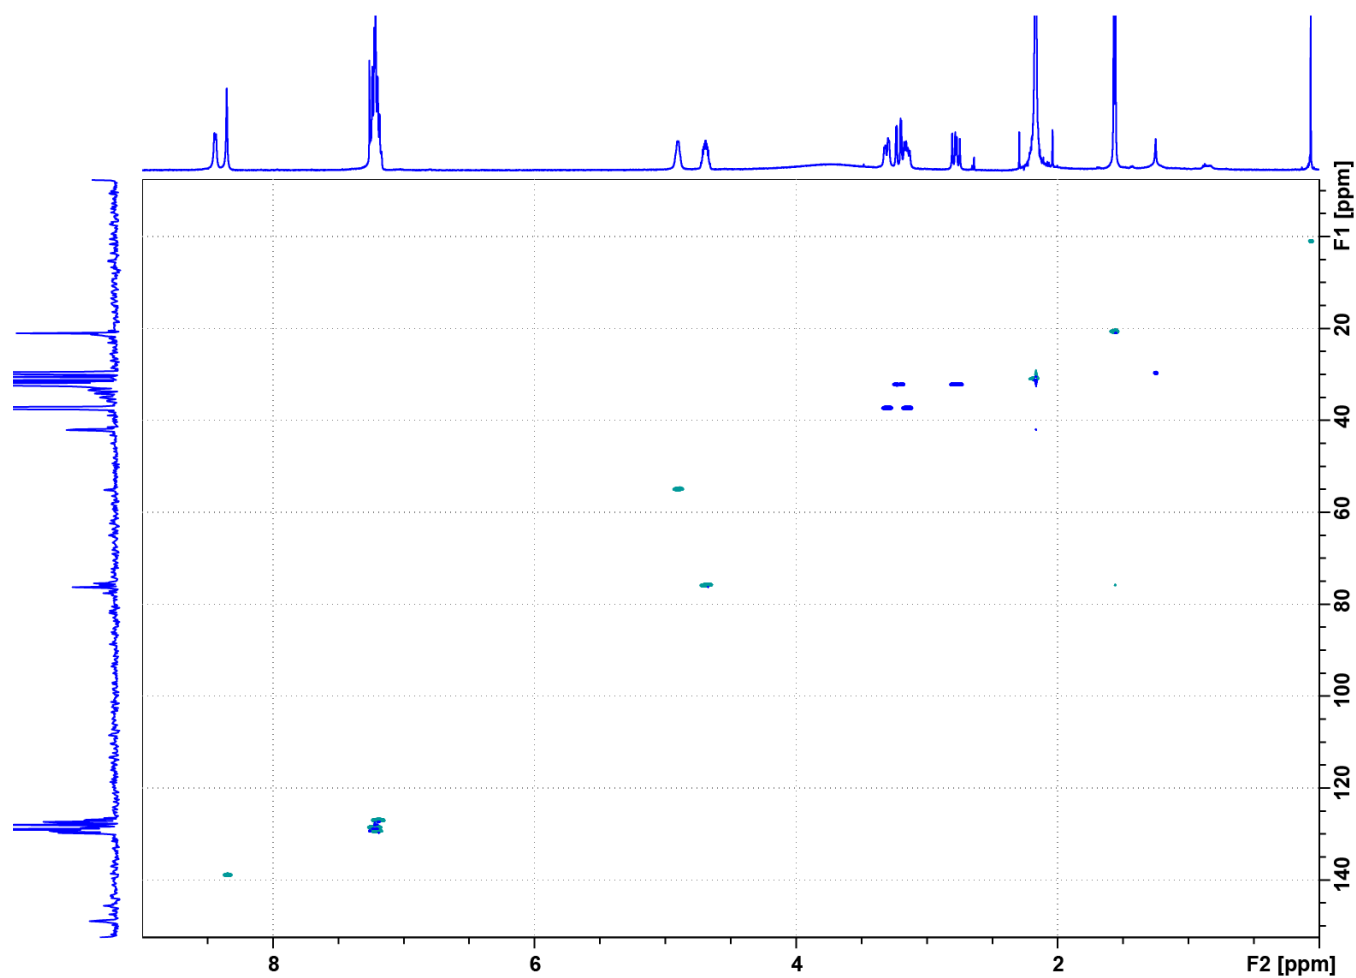

**Figure S3:**  $^1\text{H}$ - $^{13}\text{C}$  HSQC of compound **1** in chloroform-*d* at 500 MHz and 125 MHz

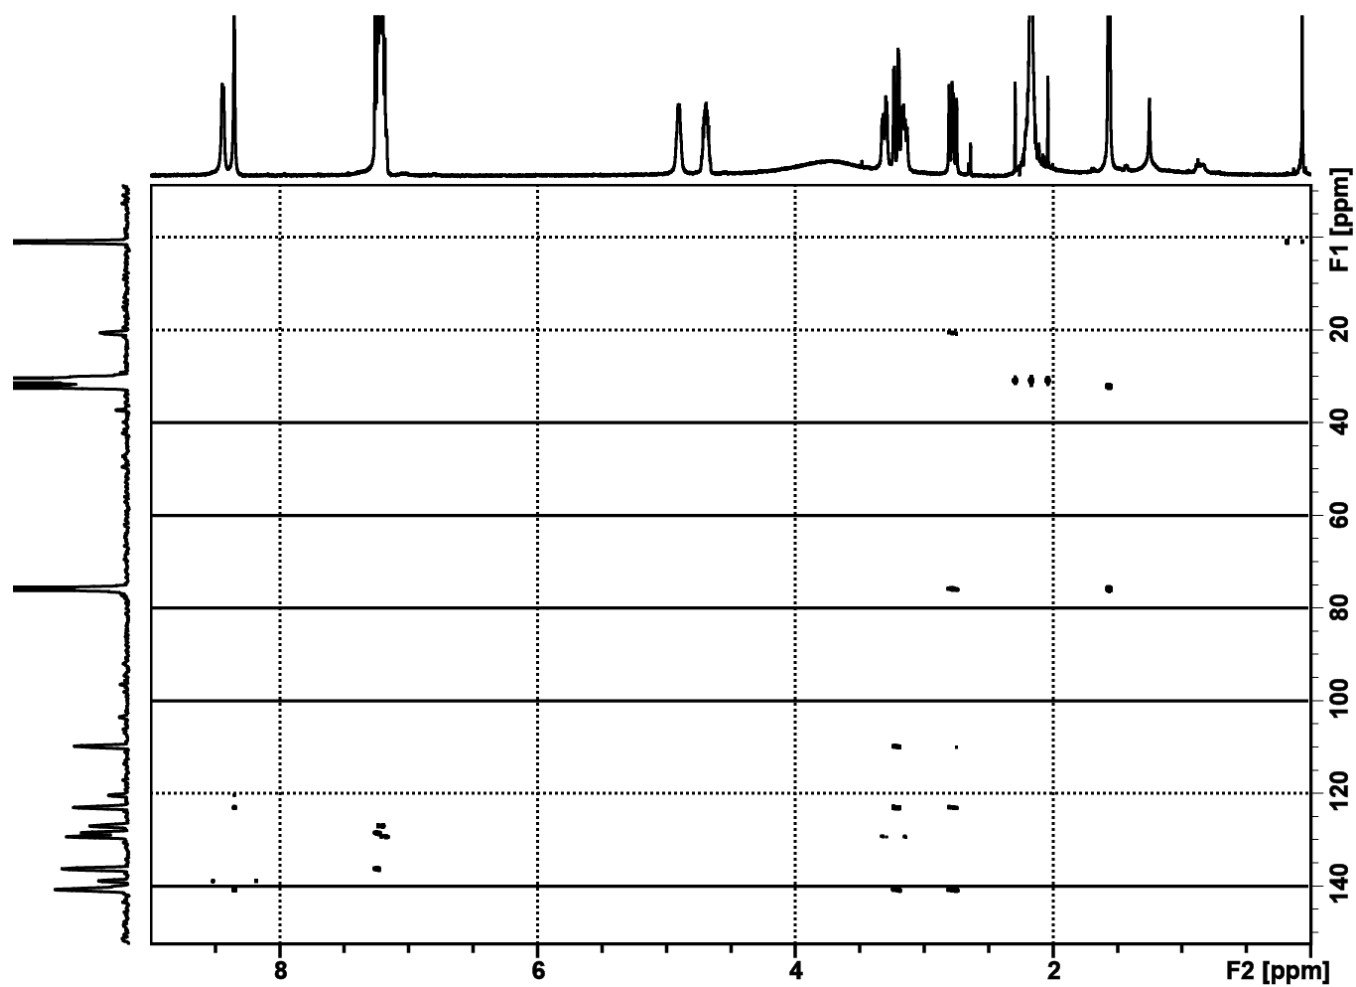

**Figure S4:**  $^1\text{H}$ - $^{13}\text{C}$  HMBC, 8 Hz optimized NMR spectrum of compound **1** in chloroform-*d* at 500 MHz and 125 MHz

**Table S1:** Compounds **2** and **3** <sup>1</sup>H and <sup>13</sup>C NMR Chemical Shifts in chloroform-*d* at 500 MHz and 125 MHz

| position            | <b>2</b>                      |                            | <b>3</b>                      |  |
|---------------------|-------------------------------|----------------------------|-------------------------------|--|
|                     | $\delta_{\text{H}}$ (J in Hz) | $\delta_{\text{C}}$ , type | $\delta_{\text{H}}$ (J in Hz) |  |
| 1                   |                               | 160.0, C                   |                               |  |
| 1-OH                | 12.30, s                      |                            | 12.73, s                      |  |
| 2                   | 6.70, d (2.6)                 | 111.1, C                   |                               |  |
| 3                   |                               | 116.5, C                   |                               |  |
| 4                   | 7.38, d (2.5)                 | 104.1, CH                  | 7.47, s                       |  |
| 4a                  |                               | 132.7, C                   |                               |  |
| 5                   | 7.69, d (1.6)                 | 122.1, CH                  | 7.70, d (1.6)                 |  |
| 6                   |                               | 149.7, CH                  |                               |  |
| 7                   | 7.18, d (1.7)                 | 125.5, CH                  | 7.18, d (1.3)                 |  |
| 8                   |                               | 162.7, C                   |                               |  |
| 8-OH                | 12.14, s                      |                            | 11.95, s                      |  |
| 8a                  |                               | 114.2, C                   |                               |  |
| 9                   |                               | 181.3, C                   |                               |  |
| 9a                  |                               | 114.2, C                   |                               |  |
| 10                  |                               | 181.3, C                   |                               |  |
| 10a                 |                               | 132.7, C                   |                               |  |
| 11                  | 2.86, dd (5.0, 5.1, 13.8);    | 46.4, CH <sub>2</sub>      | 2.85, dd (5.0, 5.4, 13.5);    |  |
|                     | 2.82, d (7.2, 7.7, 13.8)      |                            | 2.63, dd (3.5, 7.7, 9.4)      |  |
|                     | 4.15, m (5.2, 5.9, 6.1 )      | 68.7, CH                   | 4.17, m (5.4, 6.2)            |  |
| 12                  |                               |                            |                               |  |
| 13                  | 1.29, d (6.1)                 | 23.8, CH <sub>3</sub>      | 1.30, d (6.2)                 |  |
| 14-OCH <sub>3</sub> | 3.94, s                       | 57.7, CH <sub>3</sub>      | 4.11, s                       |  |



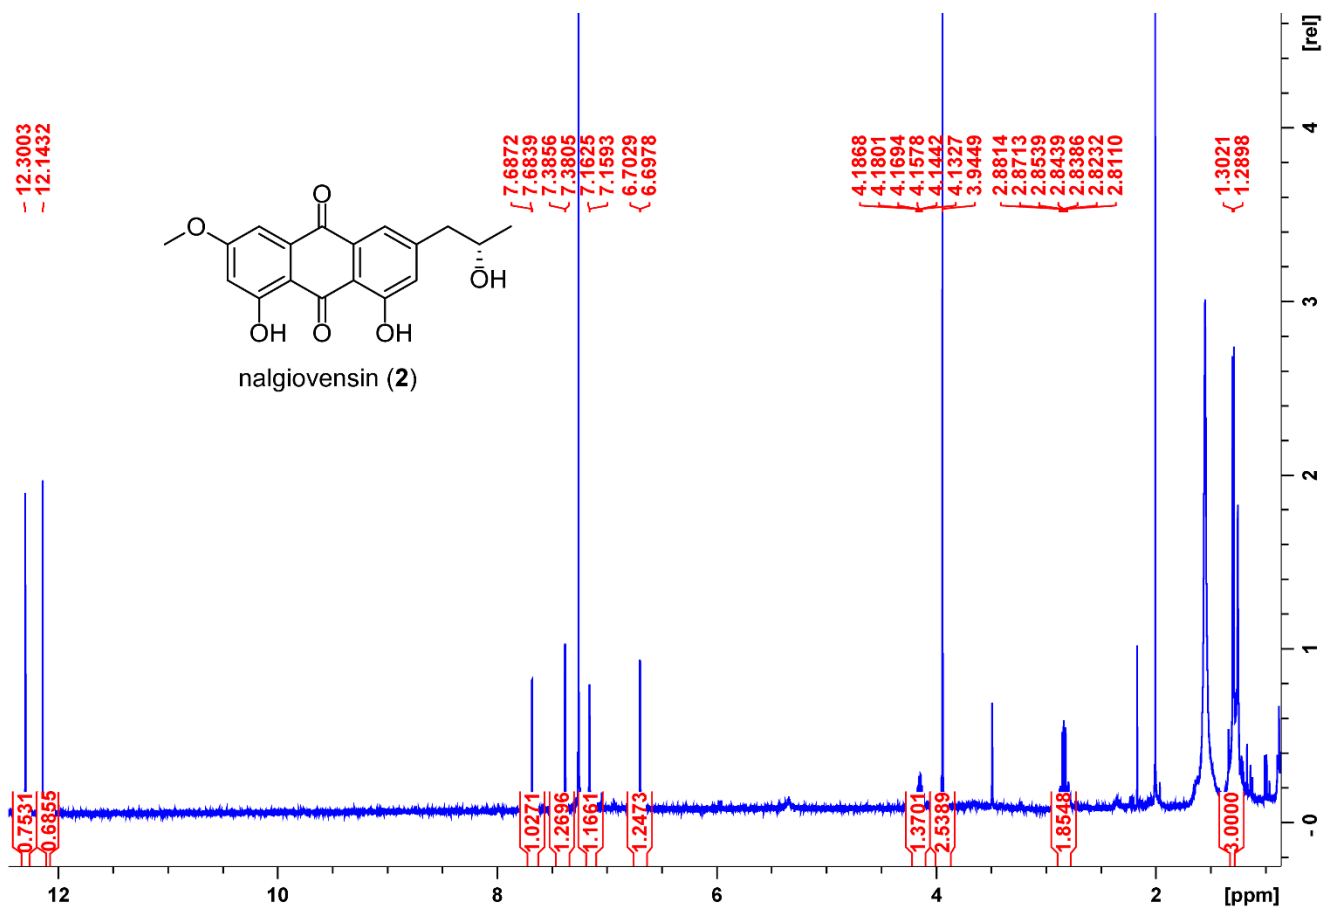

**Figure S5:** <sup>1</sup>H NMR spectrum of compound 2 in *chloroform-d* at 500 MHz

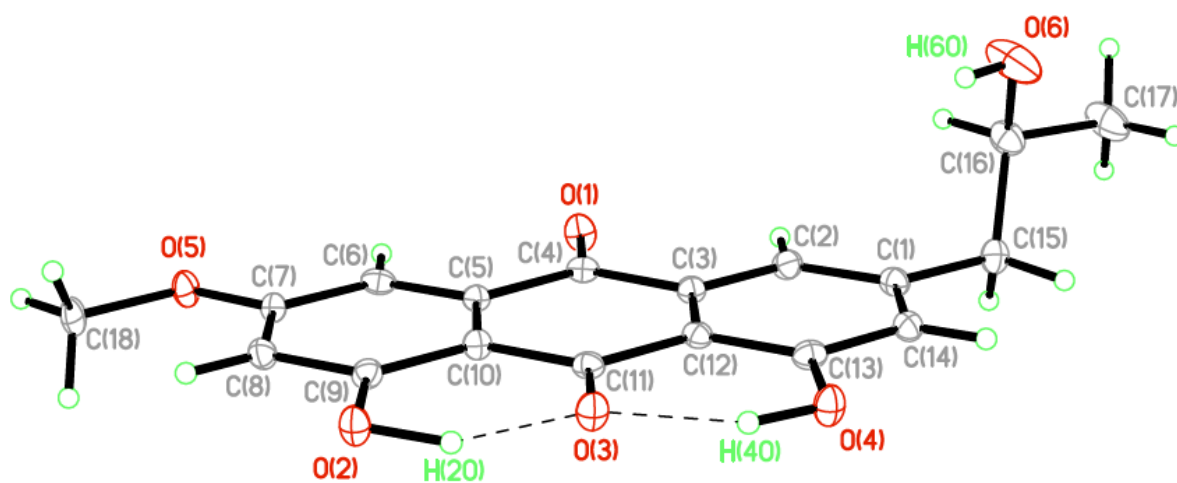

**Figure S6:** X-ray diffraction derived ORTEP plot of compound **2**. Compound **2** was dissolved in chloroform and placed in a vial with 50:50 methanol:water to create a crystal via solvent diffusion

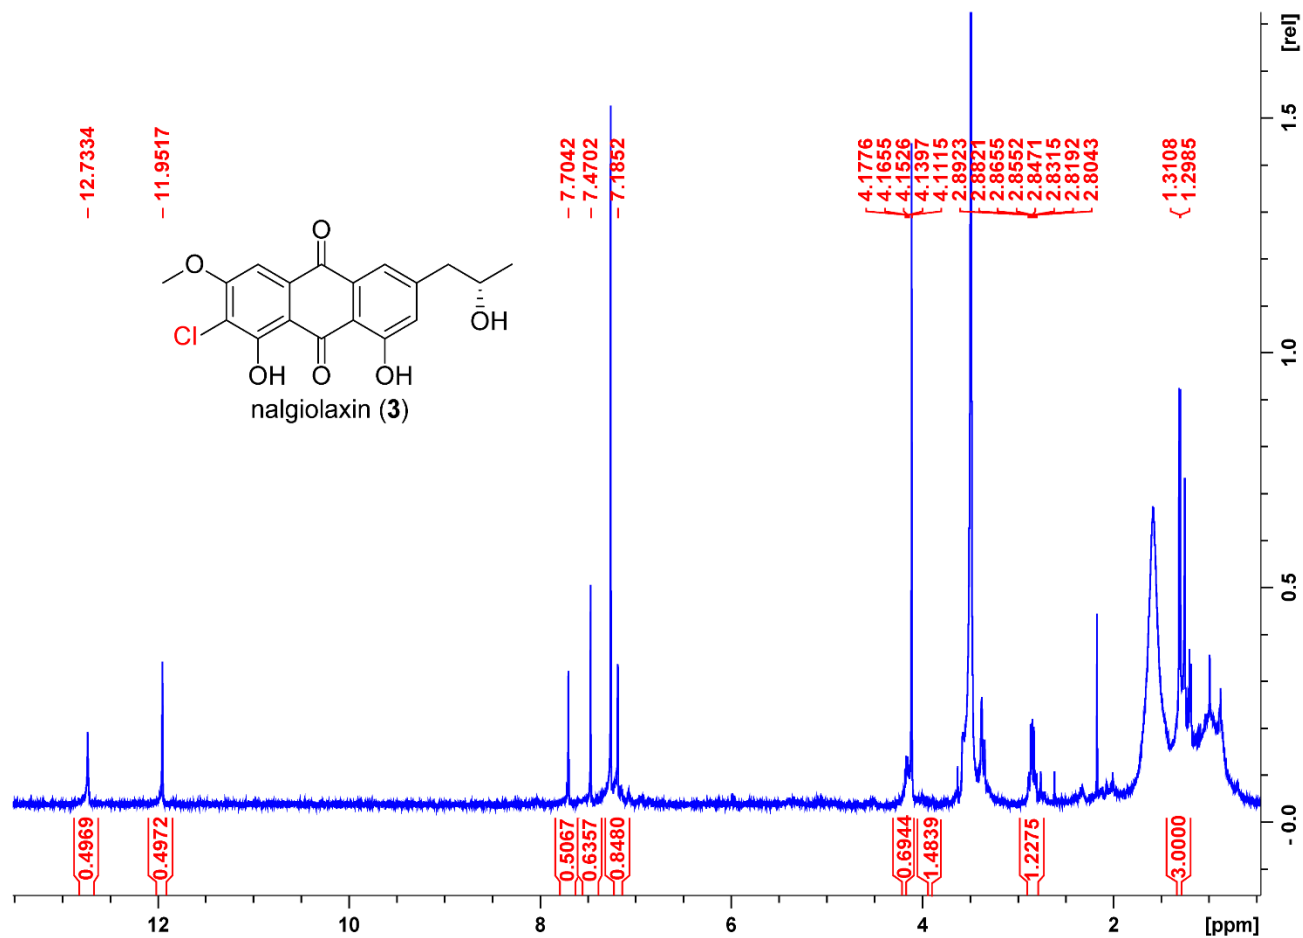

**Figure S7:** <sup>1</sup>H NMR spectrum of compound **3** in chloroform-*d* at 500 MHz

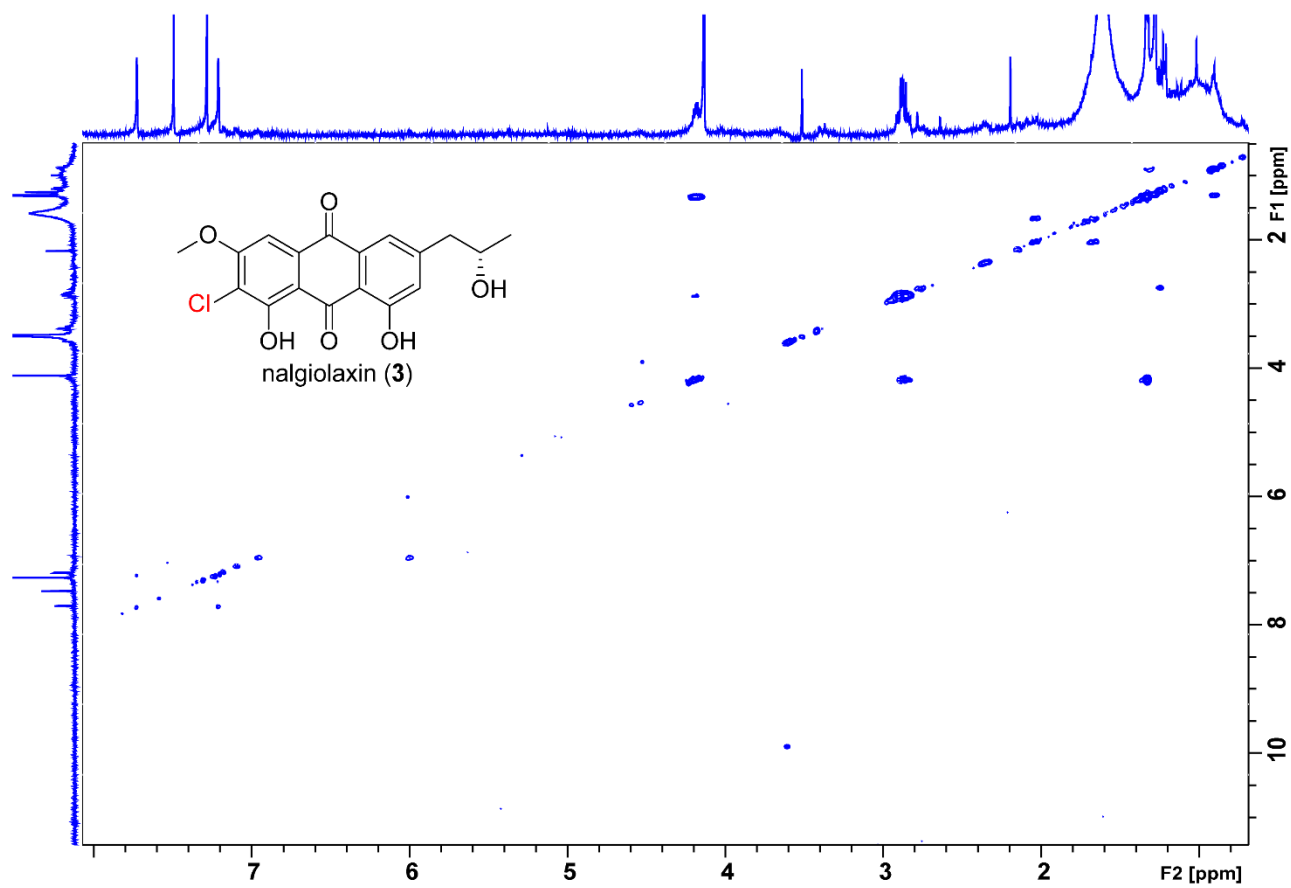

**Figure S8:**  $^1\text{H}$ - $^1\text{H}$  COSY NMR spectrum of compound **3** in chloroform-*d* at 500 MHz

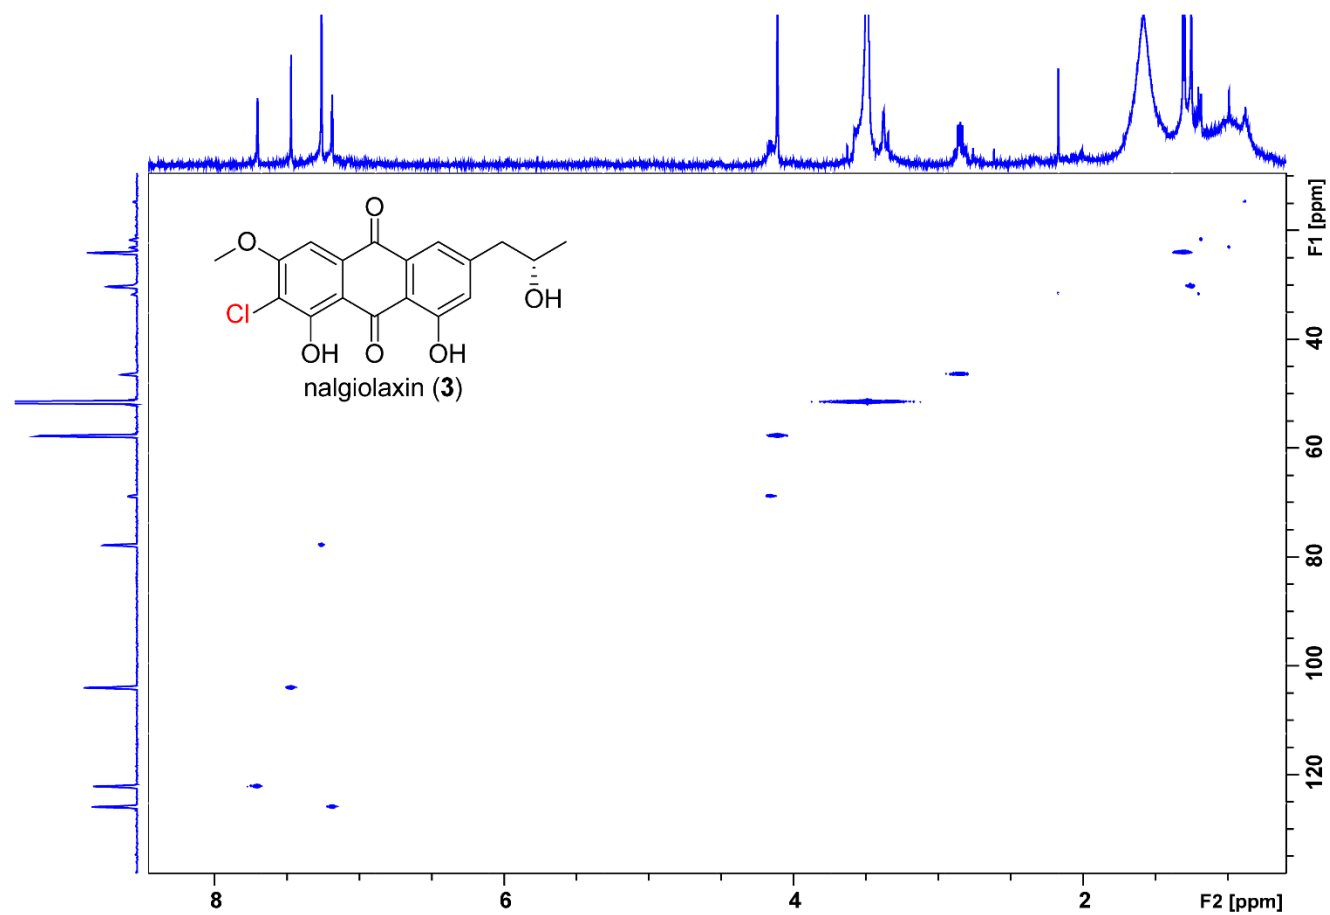

**Figure S9:**  $^1\text{H}$ - $^{13}\text{C}$  HSQC NMR spectrum of compound **3** in chloroform-*d* at 500 MHz and 125 MHz

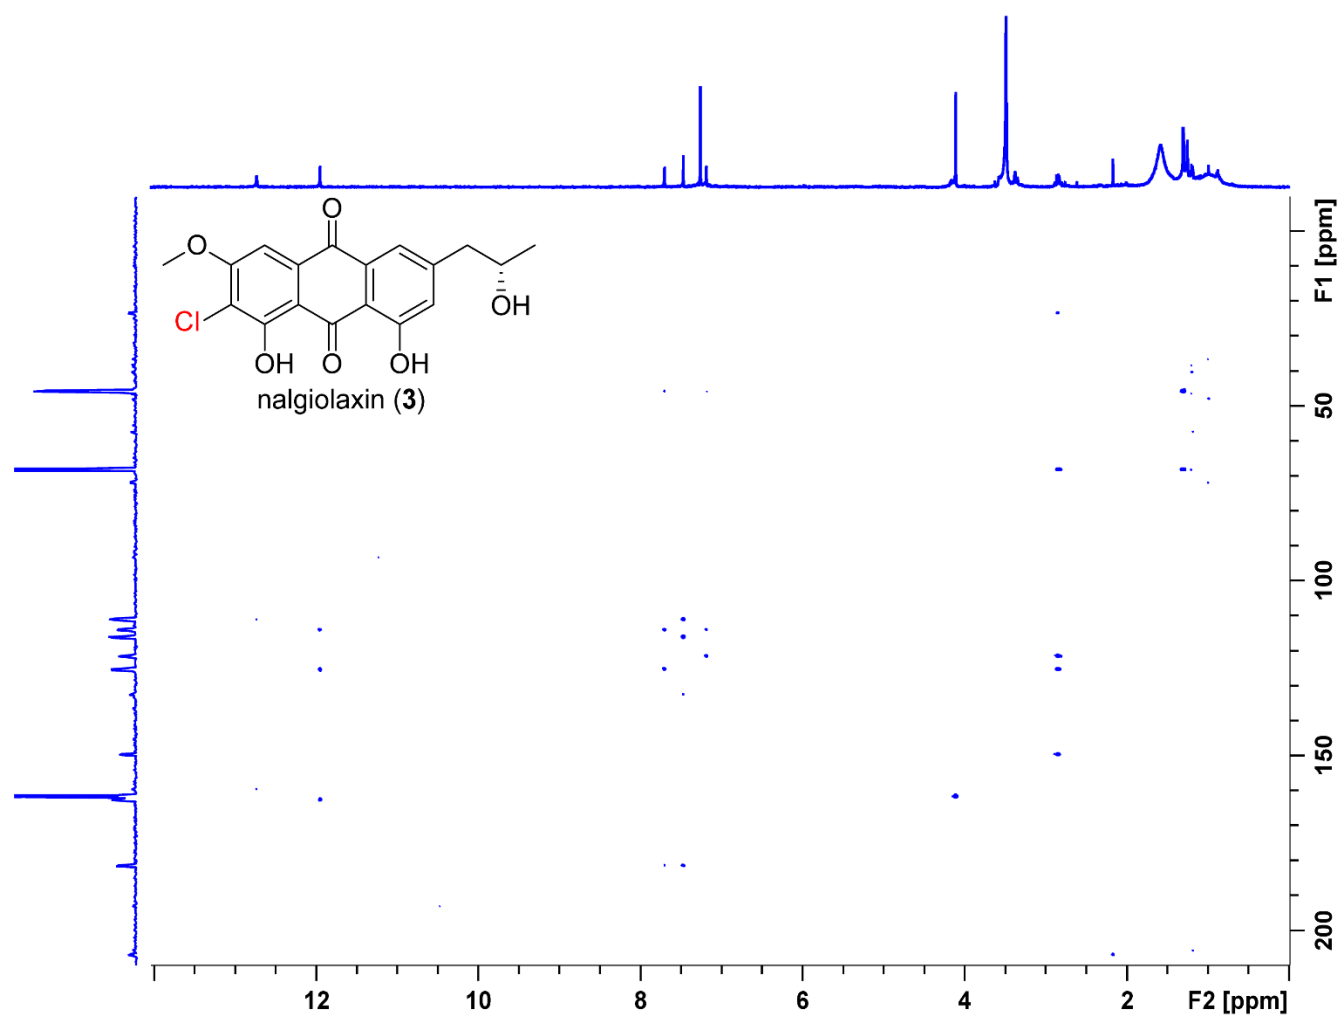

**Figure S10:**  $^1\text{H}$ - $^{13}\text{C}$  HMBC, 4 Hz optimized NMR spectrum of compound **3** in chloroform-*d* at 500 MHz and 125 MHz

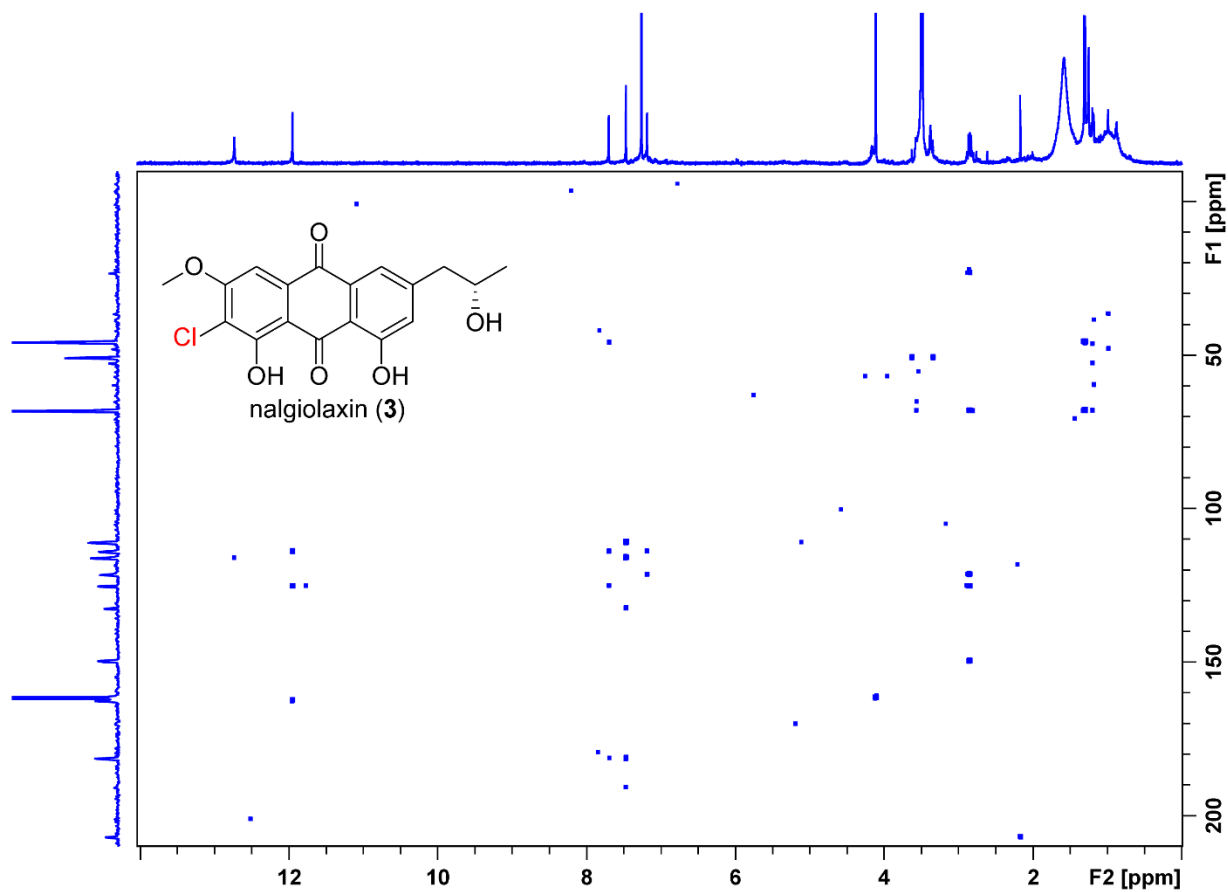

**Figure S11:**  $^1\text{H}$ - $^{13}\text{C}$  HMBC, 8 Hz optimized NMR spectrum of compound **3** in chloroform-*d* at 500 MHz and 125 MHz

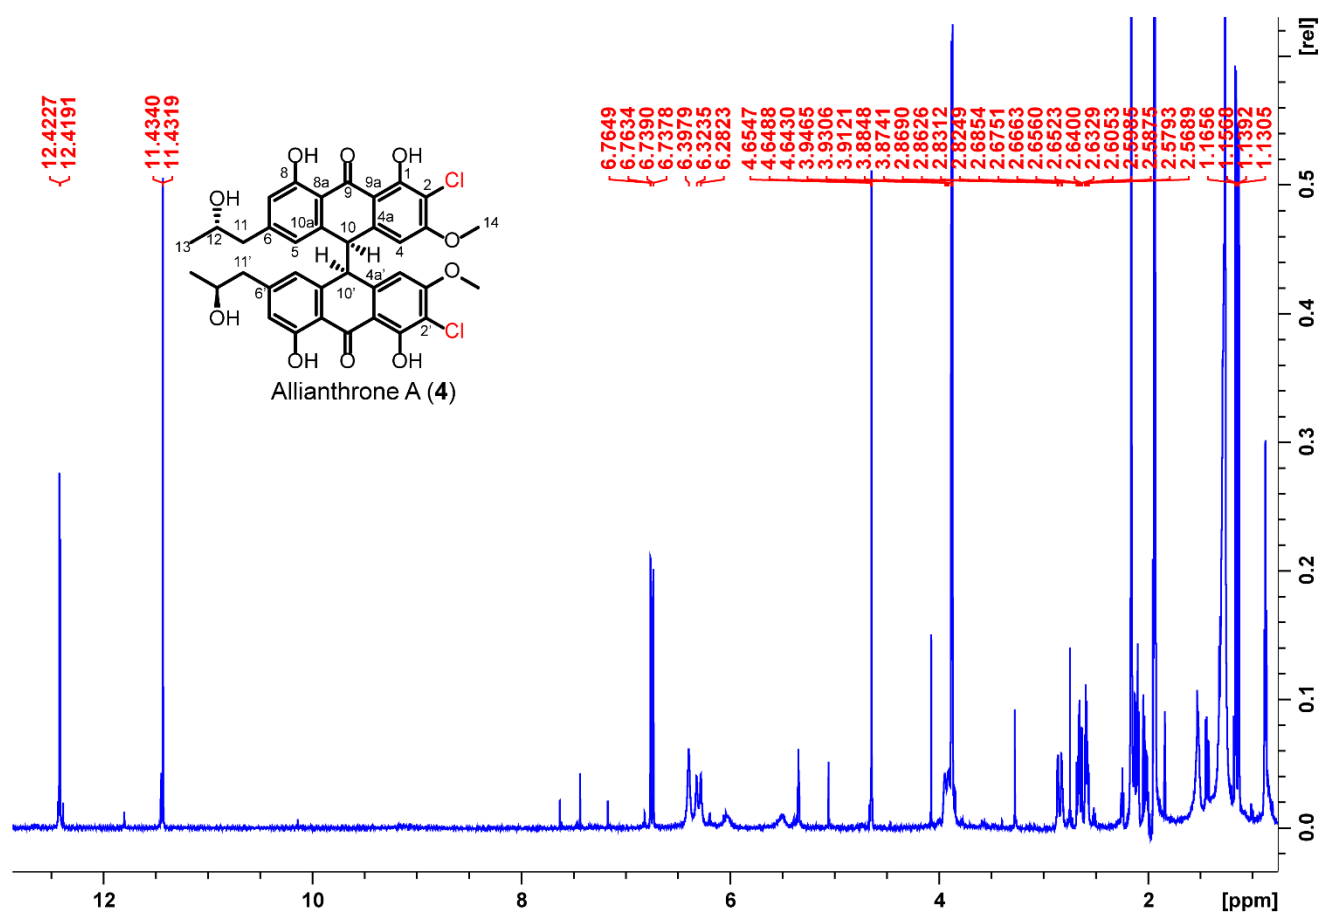

**Figure S12:**  $^1\text{H}$  NMR spectrum of compound **4** in acetonitrile- $d_3$  at 700 MHz



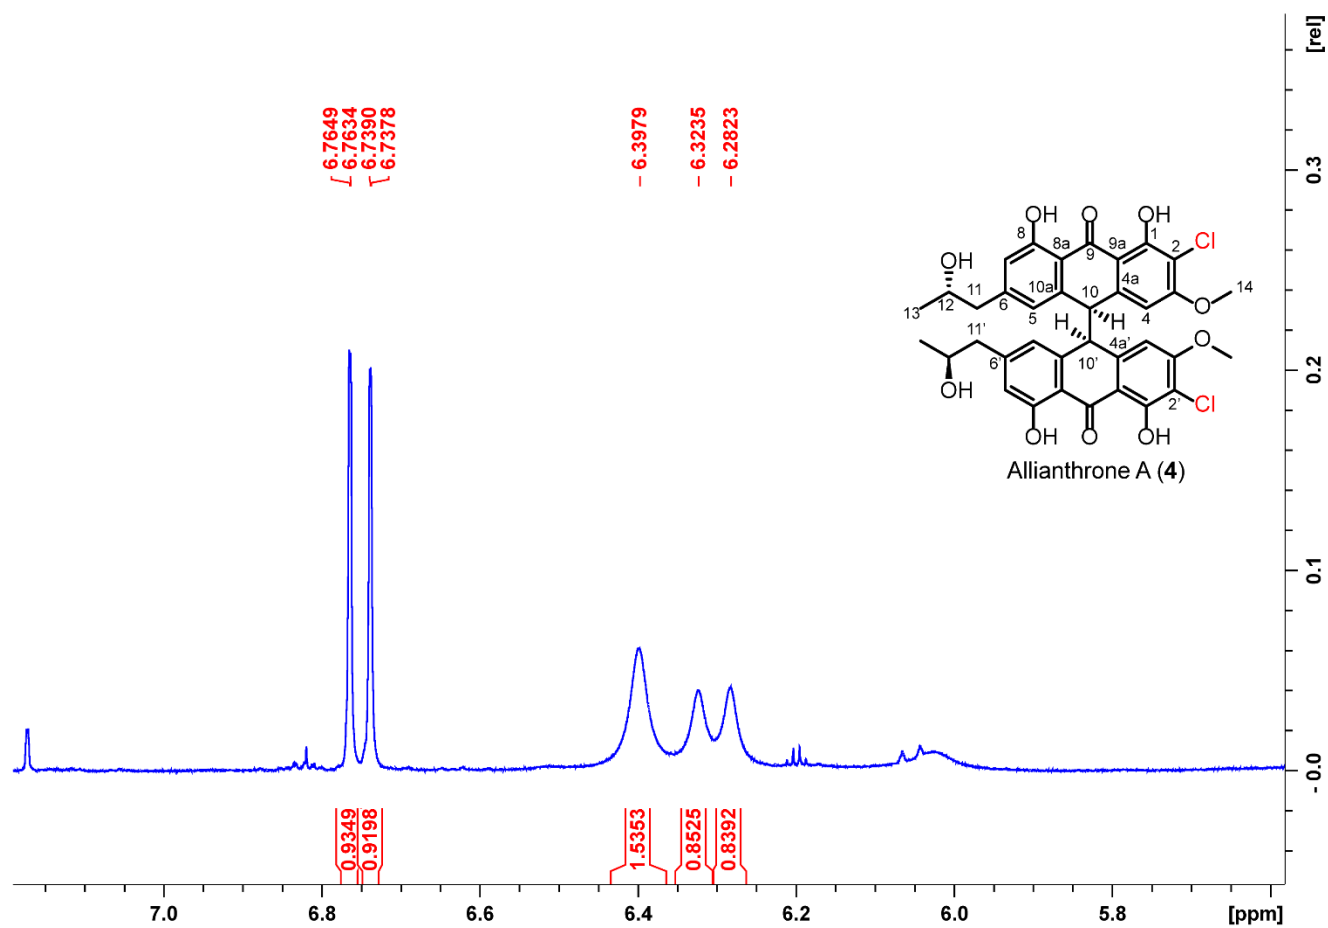

**Figure S13:**  $^1\text{H}$  NMR spectrum, 7.0 to 5.8 ppm expansion, of compound **4** in acetonitrile- $d_3$  at 700 MHz

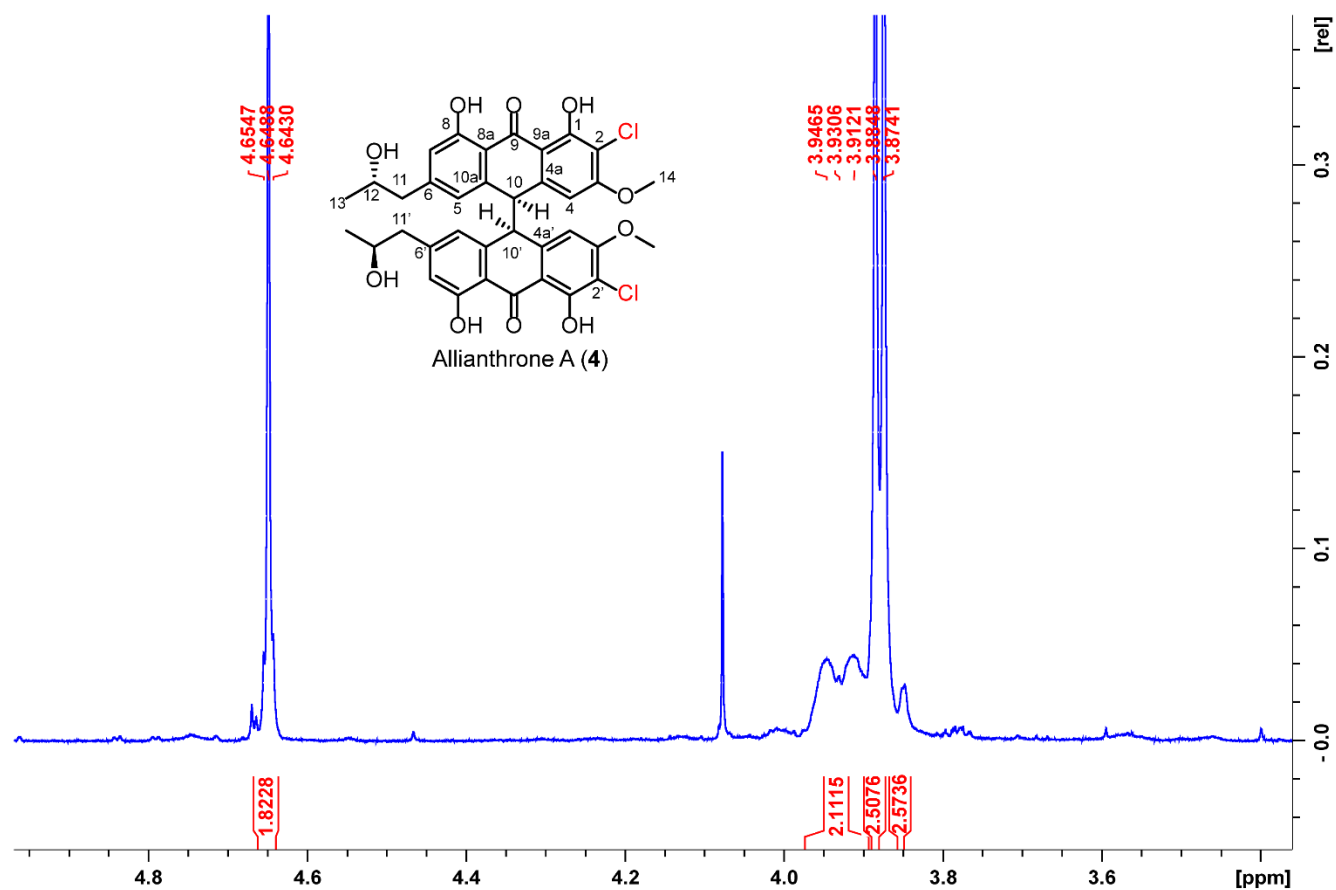

**Figure S14:**  $^1\text{H}$  NMR spectrum, 4.8 to 3.6 ppm expansion, of compound **4** in acetonitrile- $d_3$  at 700 MHz

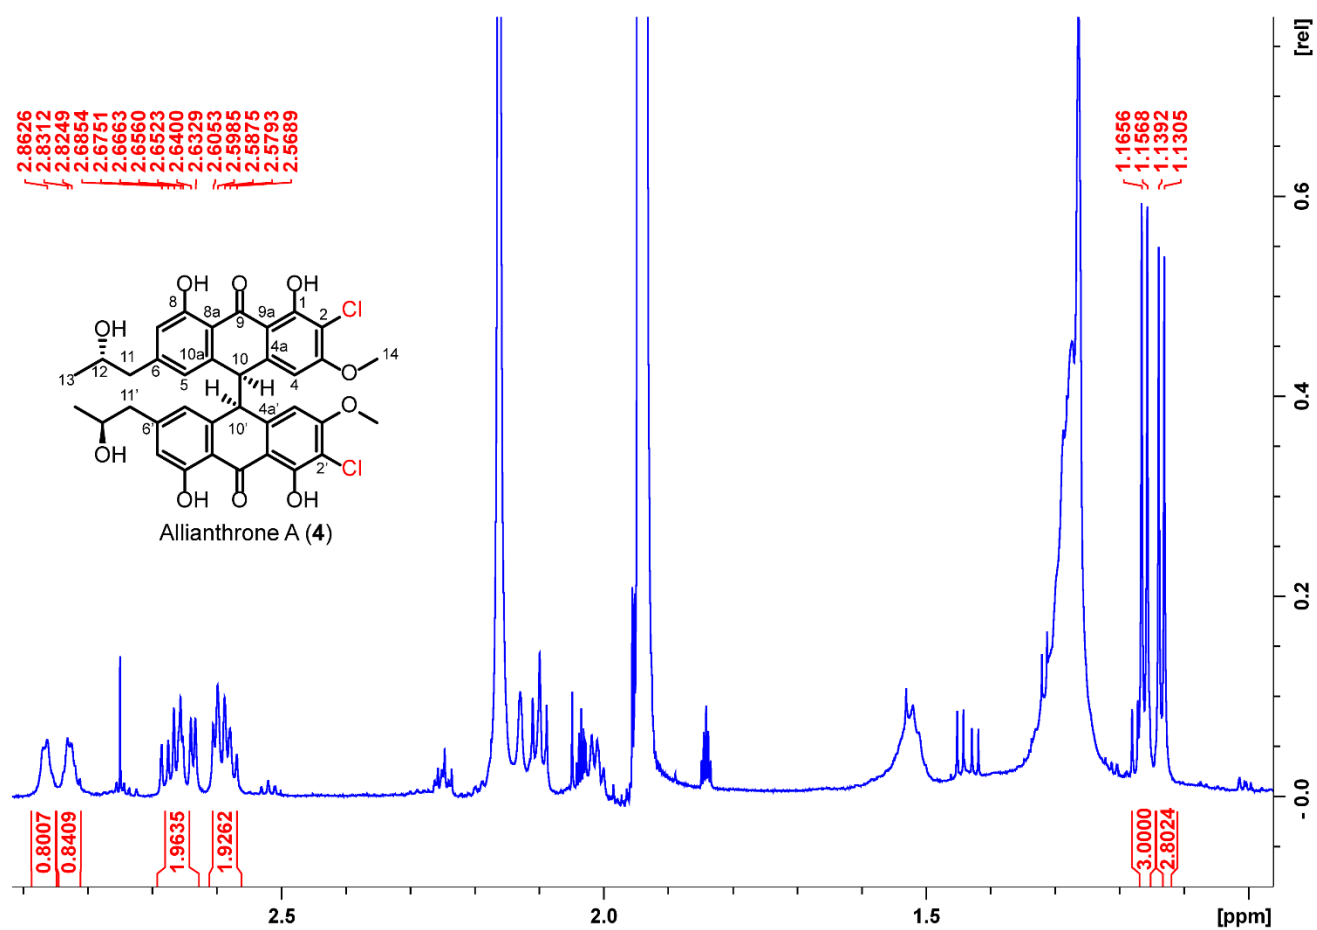

**Figure S15:**  $^1\text{H}$  NMR spectrum, 2.7 to 1.2 ppm expansion, of compound **4** in acetonitrile- $d_3$  at 700 MHz

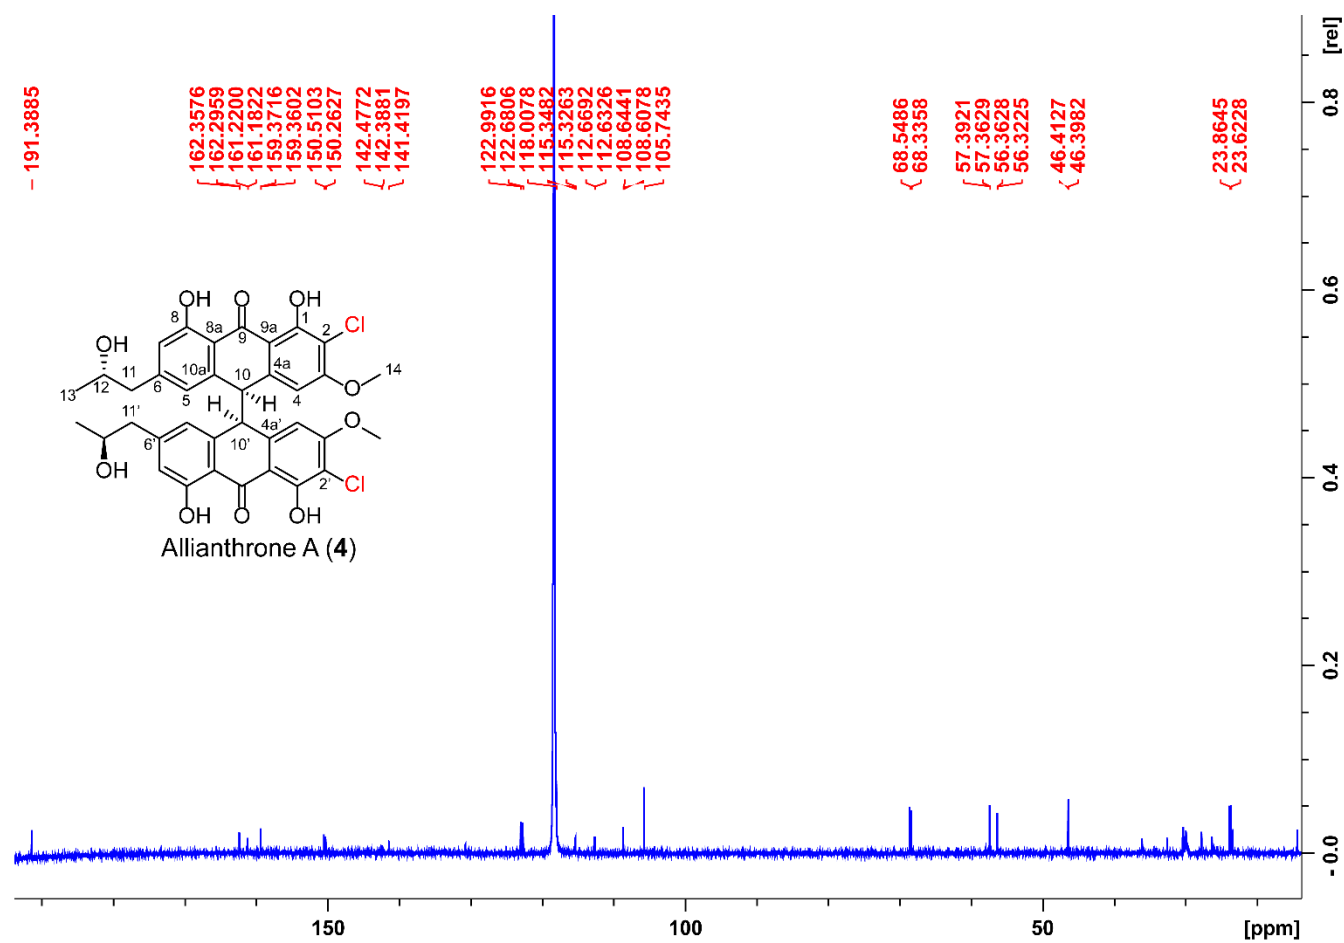

**Figure S16:**  $^{13}\text{C}$  NMR spectrum of compound **4** in acetonitrile- $d_3$  at 176 MHz

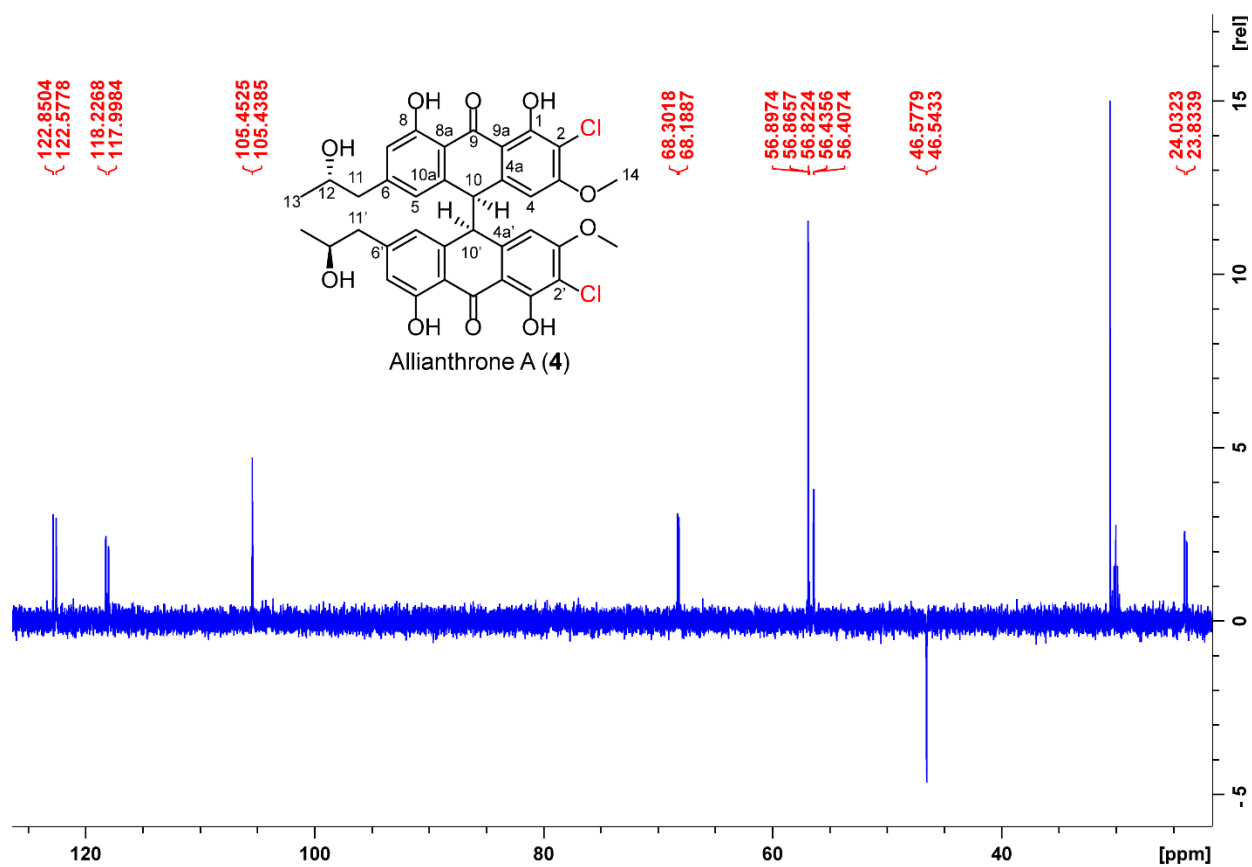

**Figure S17:** DEPT 135- $^{13}\text{C}$  NMR spectrum of compound **4** in acetone- $d_3$  at 125 MHz

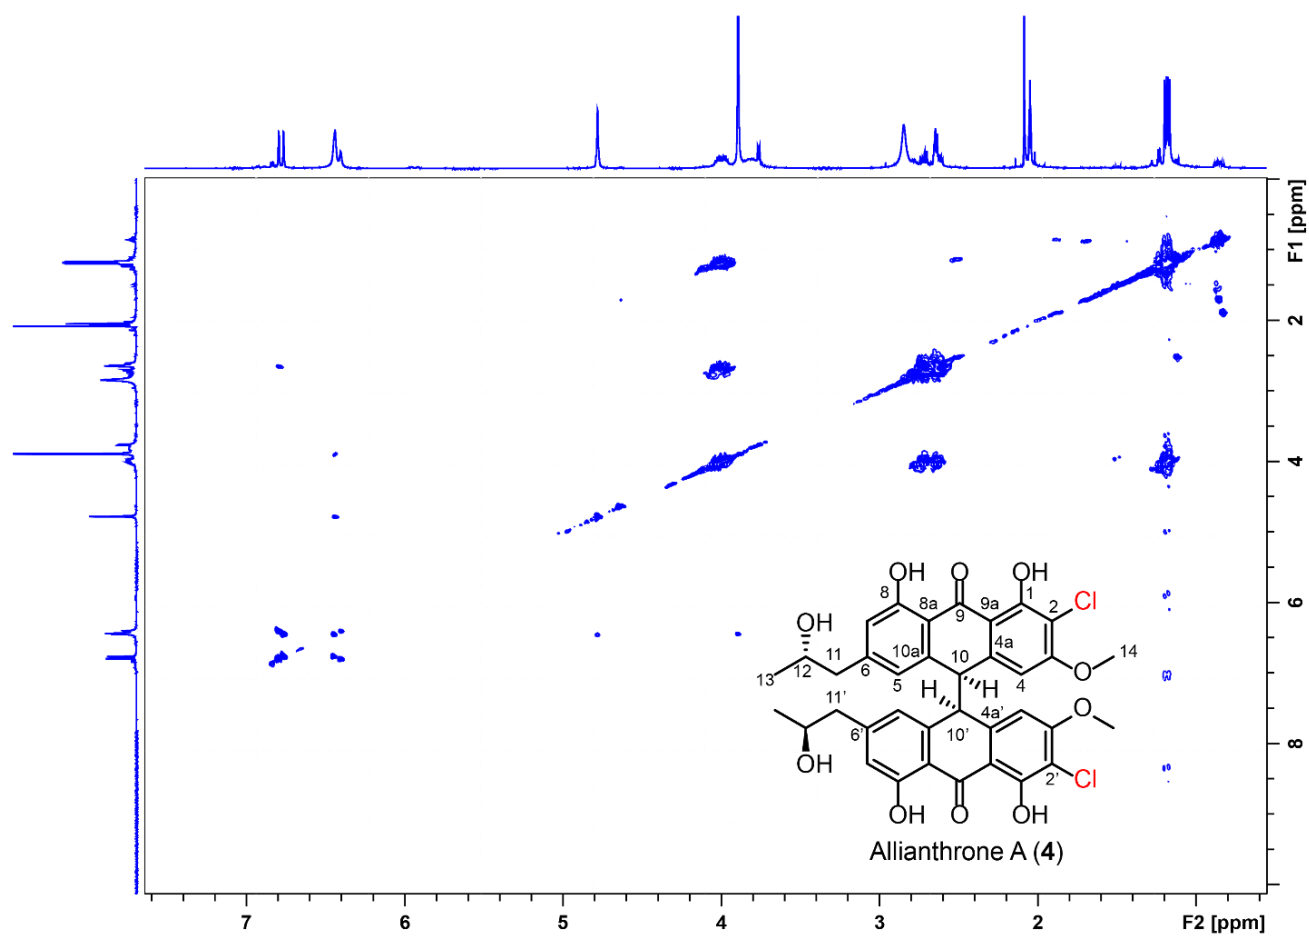

**Figure S18:**  $^1\text{H}$ - $^1\text{H}$  COSY NMR spectrum of compound **4** in acetone- $d_3$  at 500 MHz

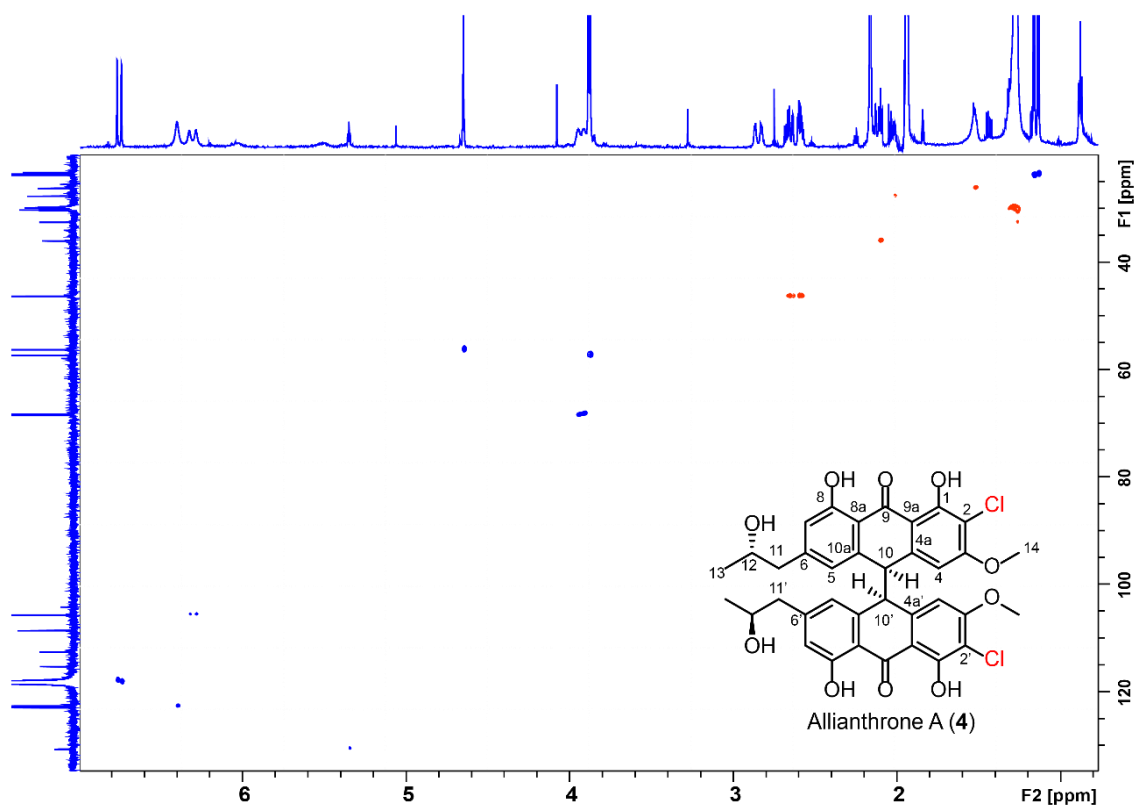

**Figure S19:**  $^1\text{H}$ - $^{13}\text{C}$  HSQC NMR spectrum of compound **4** in acetonitrile- $d_3$  at 700 MHz and 176 MHz

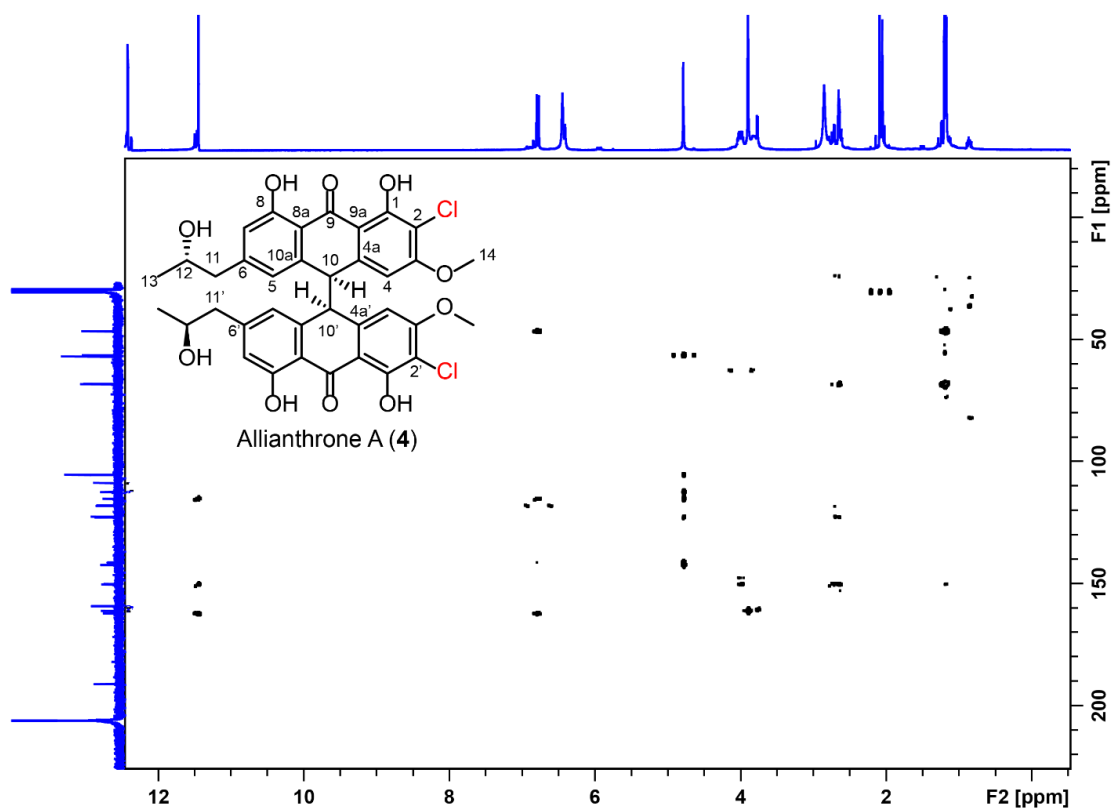

**Figure S20:**  $^1\text{H}$ - $^{13}\text{C}$  HMBC, 4 Hz optimized NMR spectrum of compound **4** in acetone- $d_3$  at 500 MHz and 125 MHz



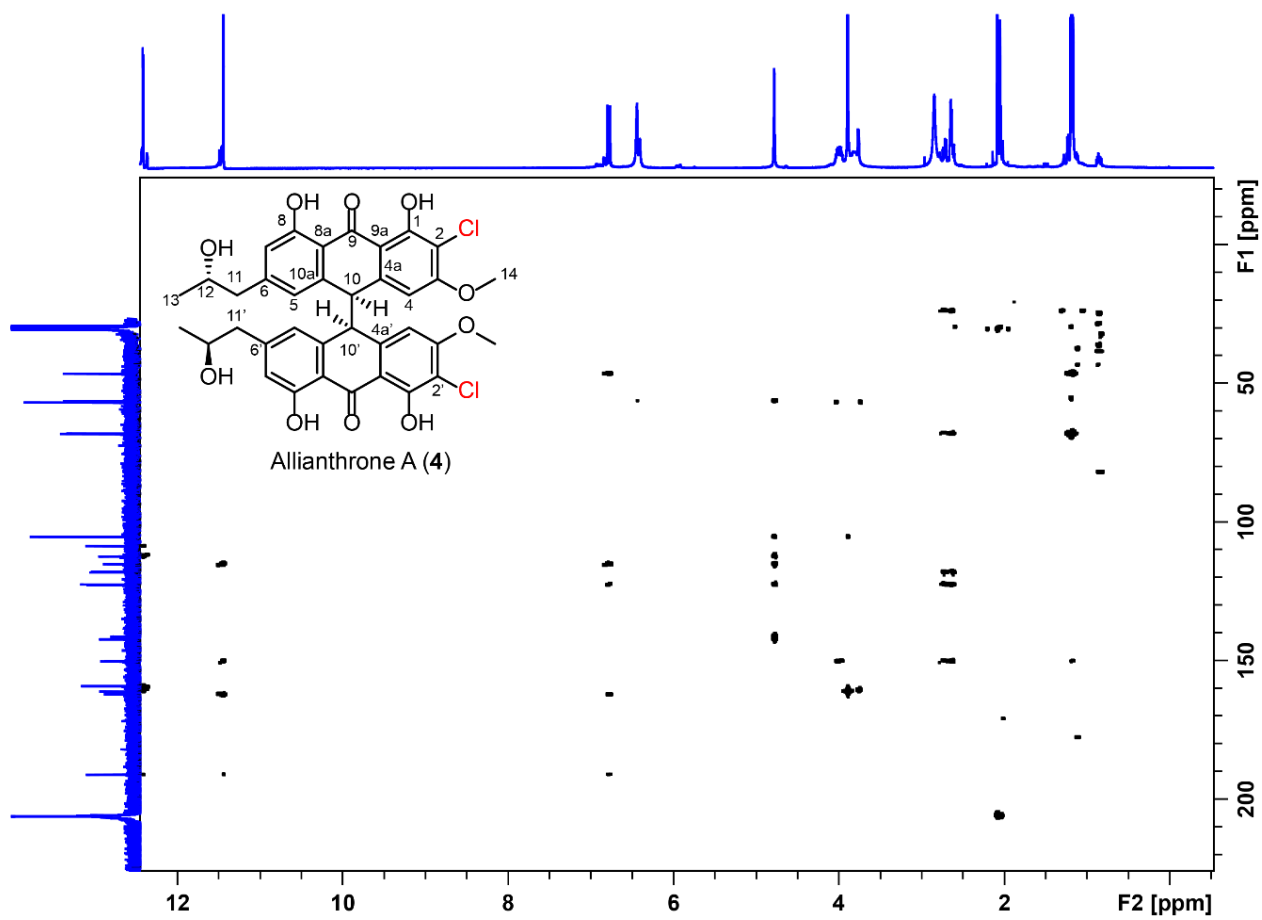

**Figure S21:**  $^1\text{H}$ - $^{13}\text{C}$  HMBC, 8 Hz optimized NMR spectrum of compound **4** in acetone- $d_3$  at 500 MHz and 125 MHz

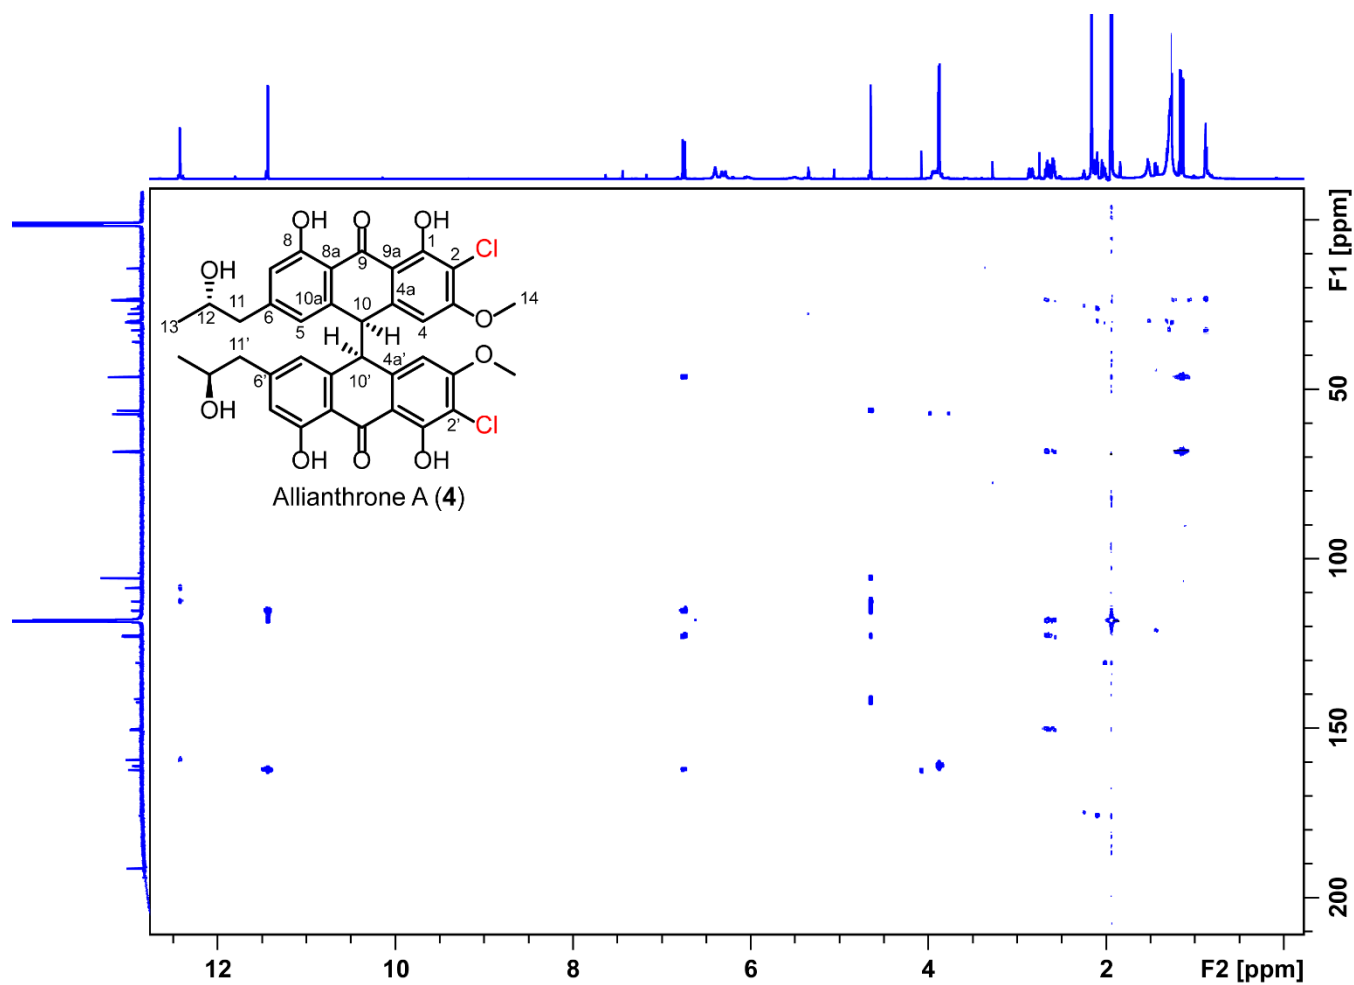

**Figure S22:**  $^1\text{H}$ - $^{13}\text{C}$  HMBC, 4 Hz optimized NMR spectrum of compound **4** in acetonitrile- $d_3$  at 700 MHz and 176 MHz

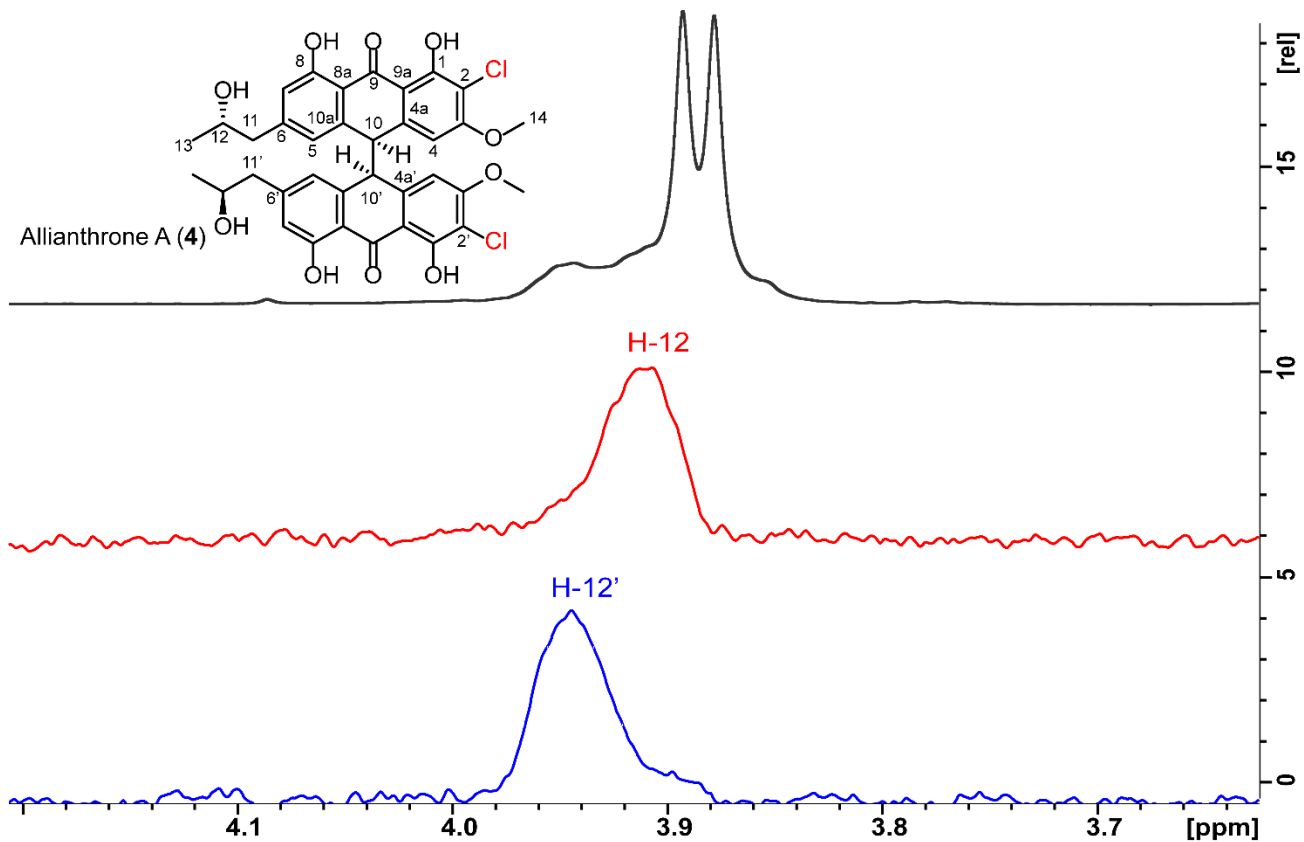

**Figure S23:** SEL-TOCSY of compound **4** in acetonitrile- $d_3$  at 700 MHz. Selective irradiation of H-13/13' established the identity of H-12 as belonging to alpha ring system (red) and H-12' as belonging to the beta ring system (blue)

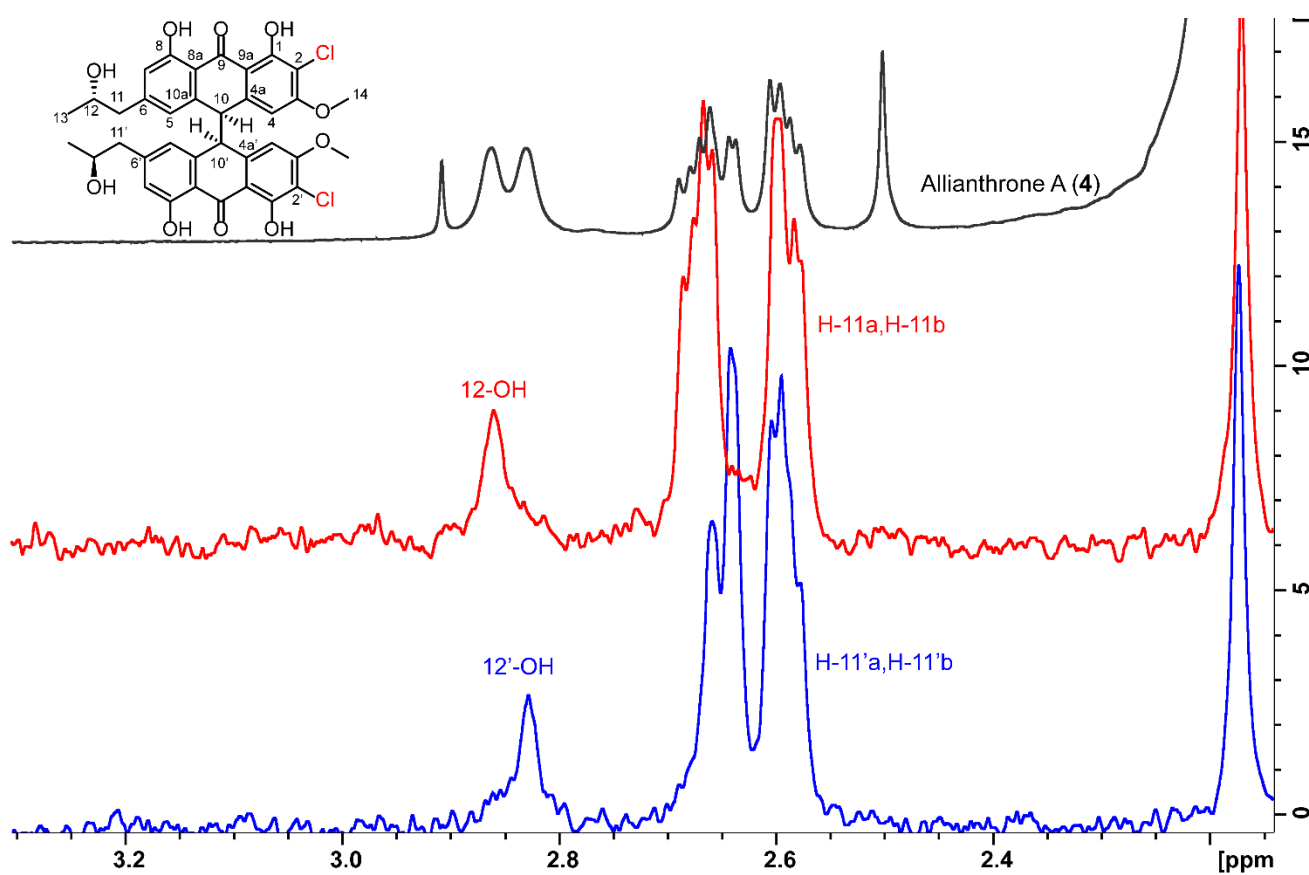

**Figure S24:** SEL-TOCSY of compound **4** in acetonitrile- $d_3$  at 700 MHz. Selective irradiation of H-13/13' established the identity of H-11a, H-11b and 12-OH as belonging to the alpha ring system (red) and H-11'a, H-11'b and 12'-OH as belonging to the beta ring system (blue)

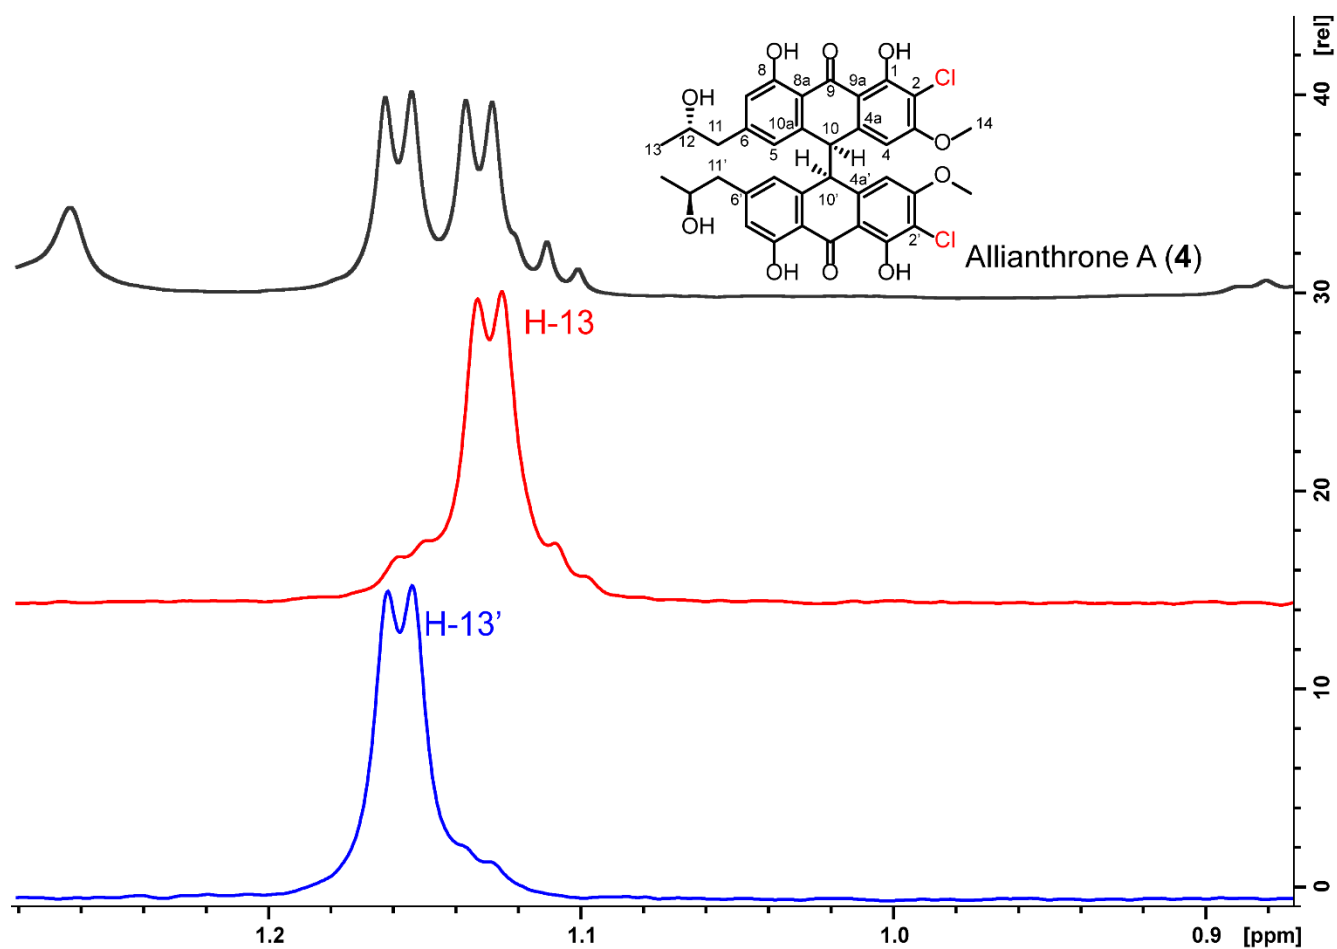

**Figure S25:** SEL-TOCSY of compound **4** in acetonitrile- $d_3$  at 700 MHz. Selective irradiation of H-13/13' established the identity of H-13 as belonging to the alpha ring system (red) and H-13' as belonging to the beta ring system (blue)

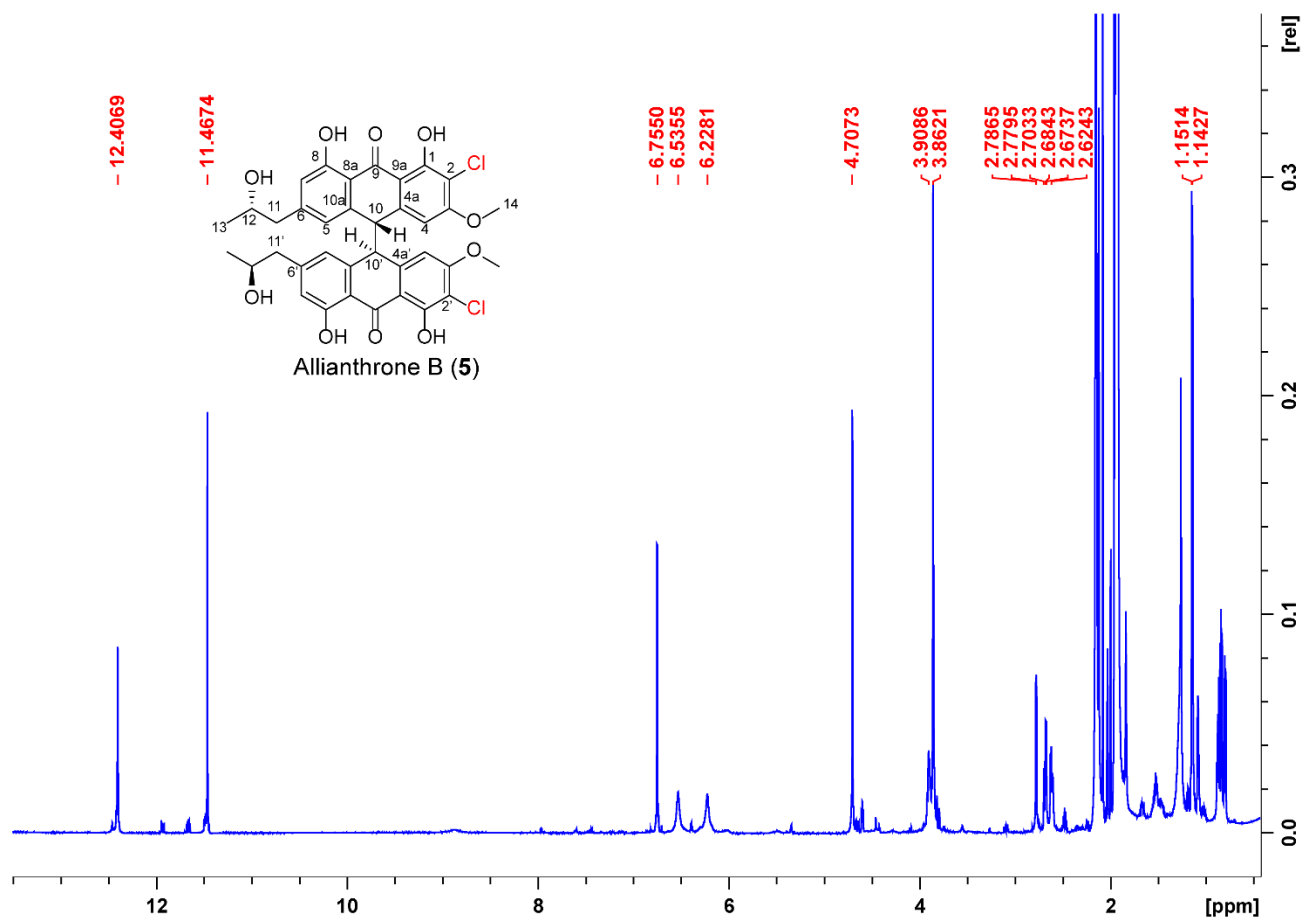

**Figure S26:**  $^1\text{H}$  NMR spectrum of compound **5** in acetonitrile- $d_3$  at 700 MHz

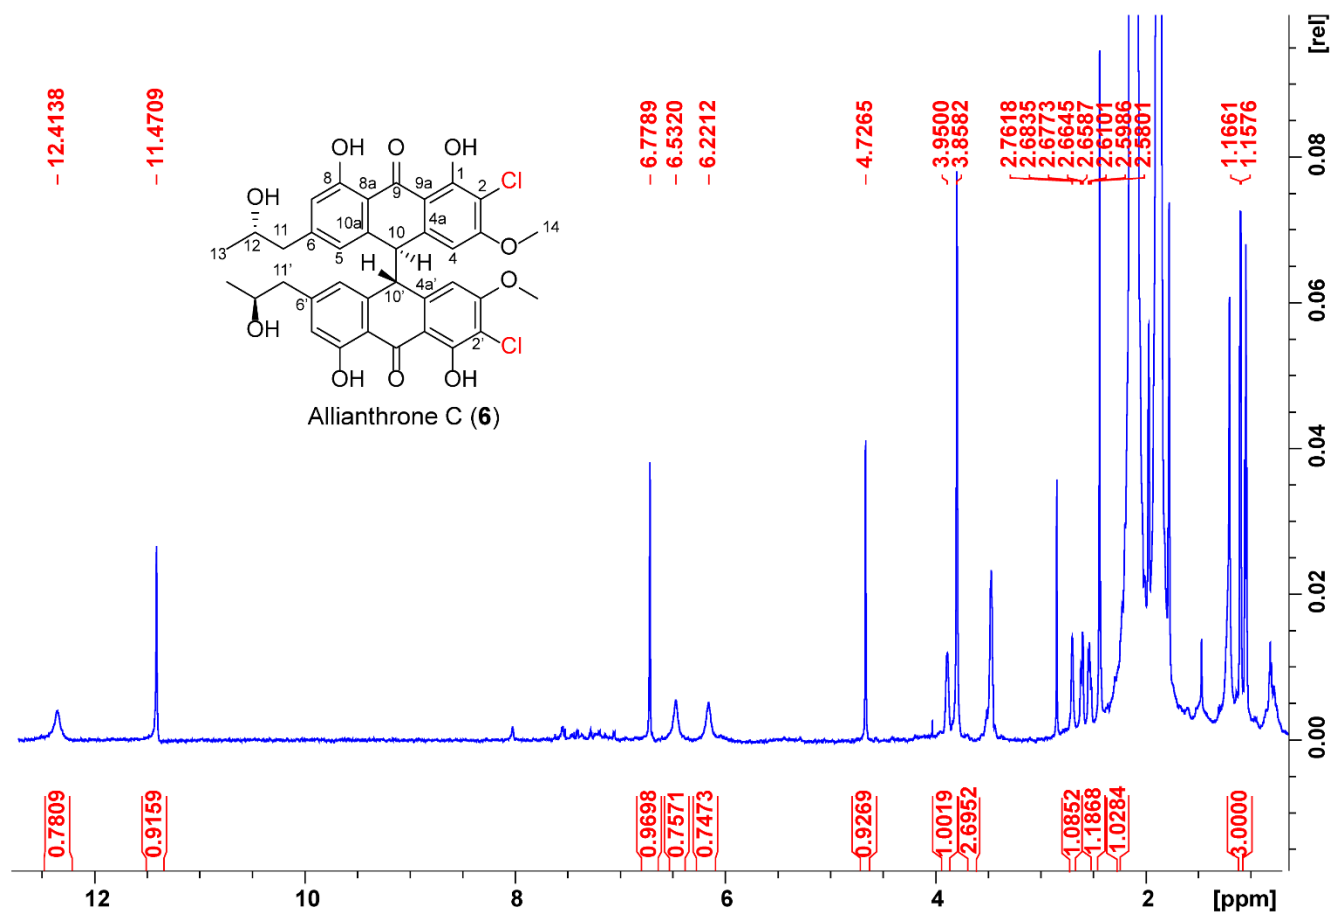

Figure S27:  $^1\text{H}$  NMR spectrum of compound **6** in acetonitrile- $d_3$  at 700 MHz

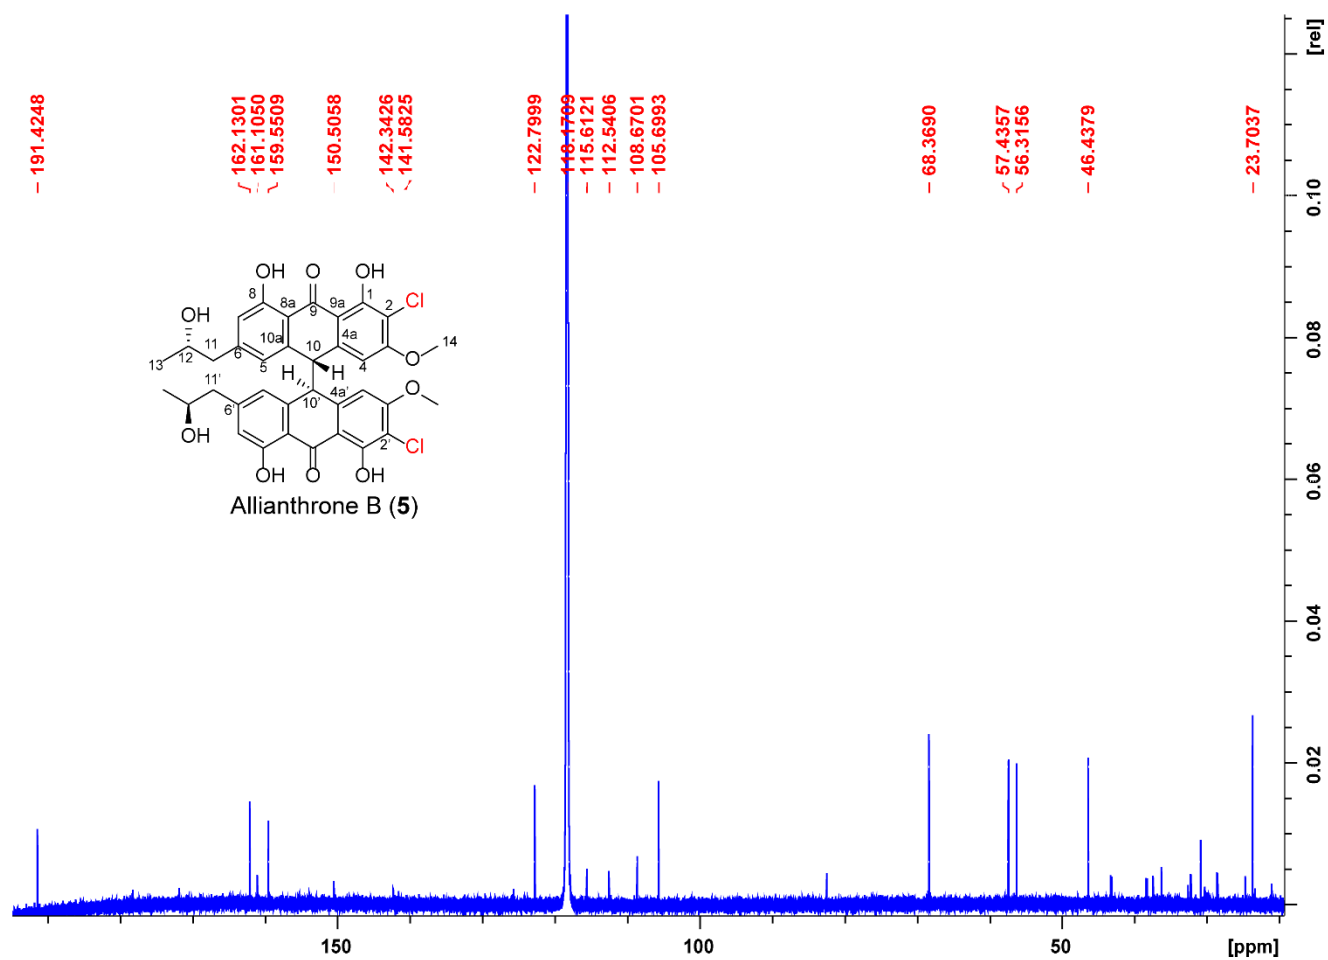

**Figure S28:**  $^{13}\text{C}$  NMR spectrum of compound **5** in acetonitrile- $d_3$  at 176 MHz



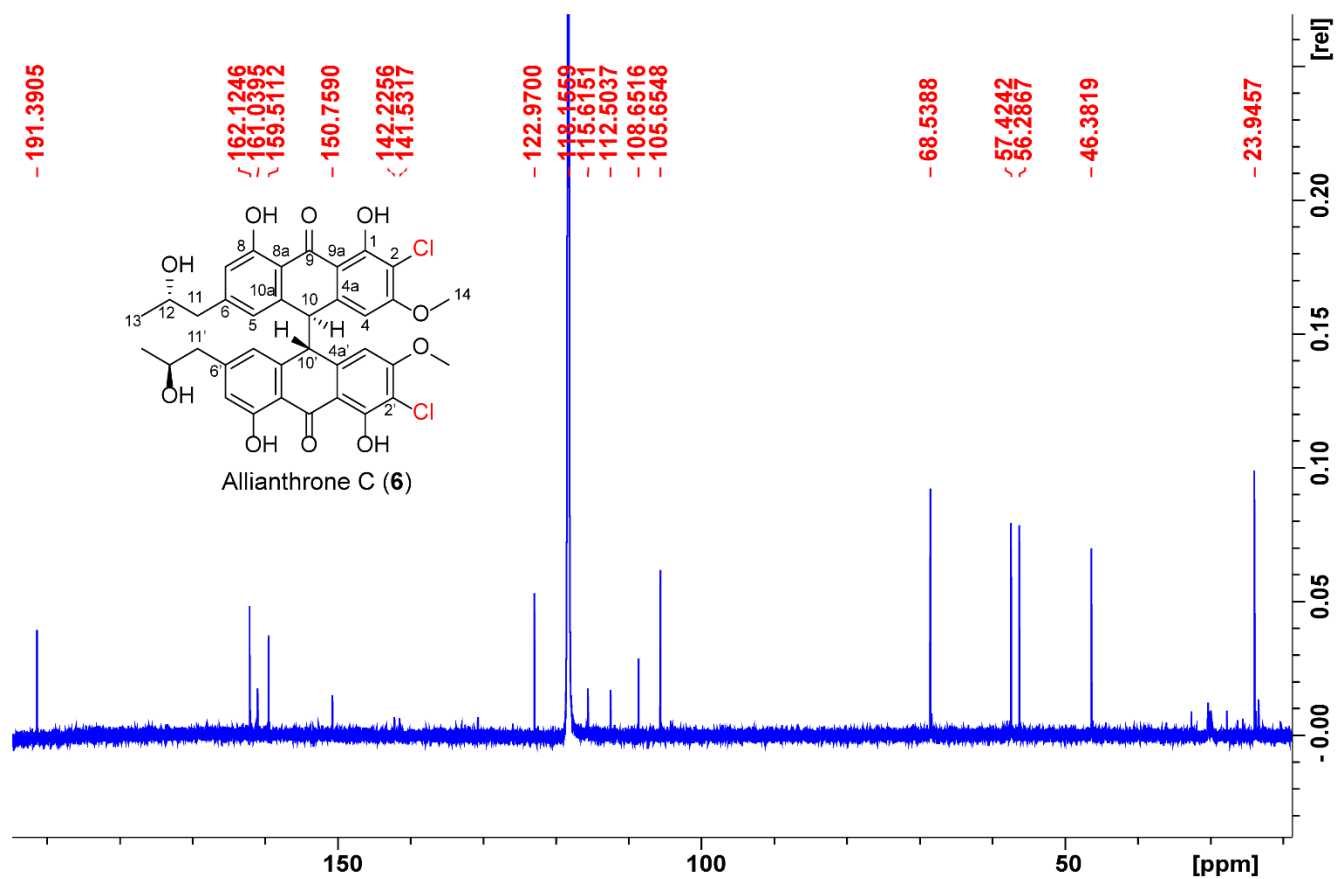

**Figure S29:**  $^{13}\text{C}$  NMR spectrum of compound **6** in acetonitrile- $d_3$  at 176 MHz

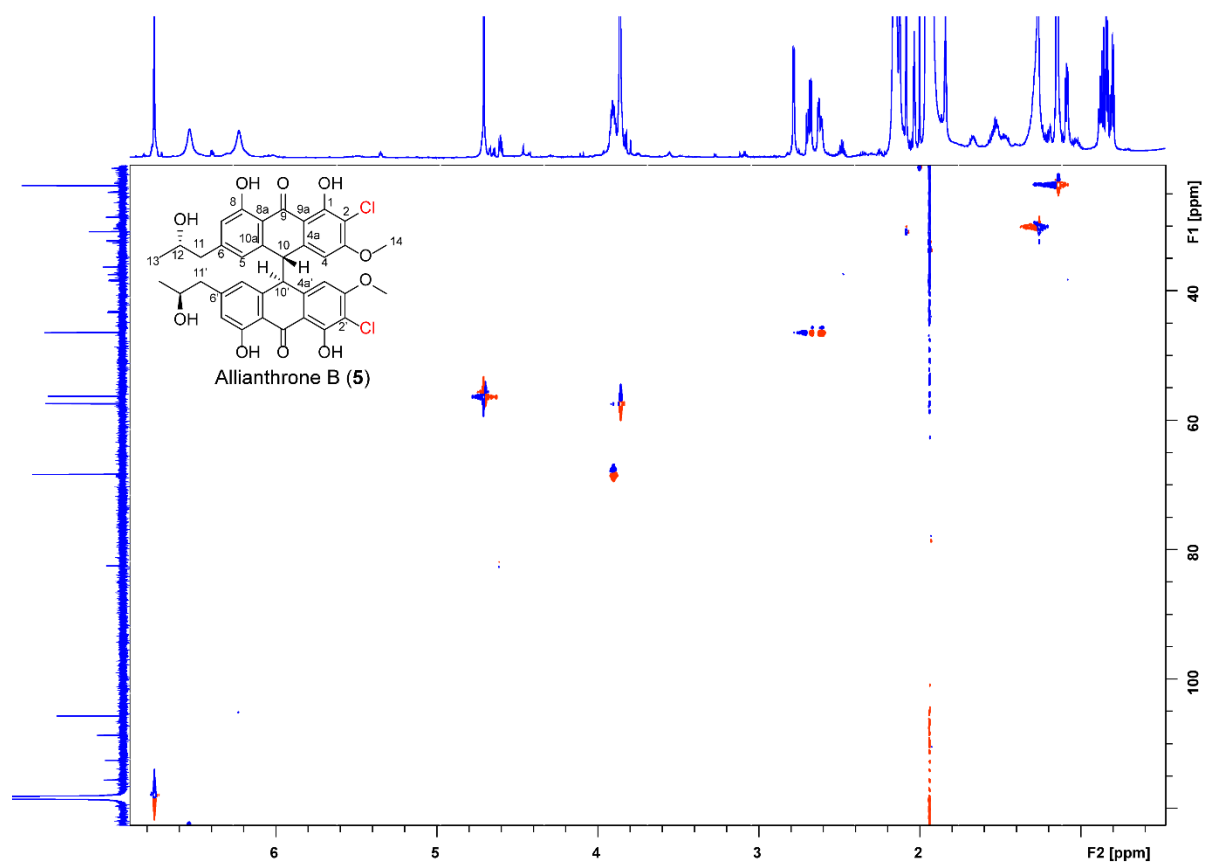

**Figure S30:**  $^1\text{H}$ - $^{13}\text{C}$  HSQC NMR spectrum of compound **5** in acetonitrile- $d_3$  at 700 MHz and 176 MHz

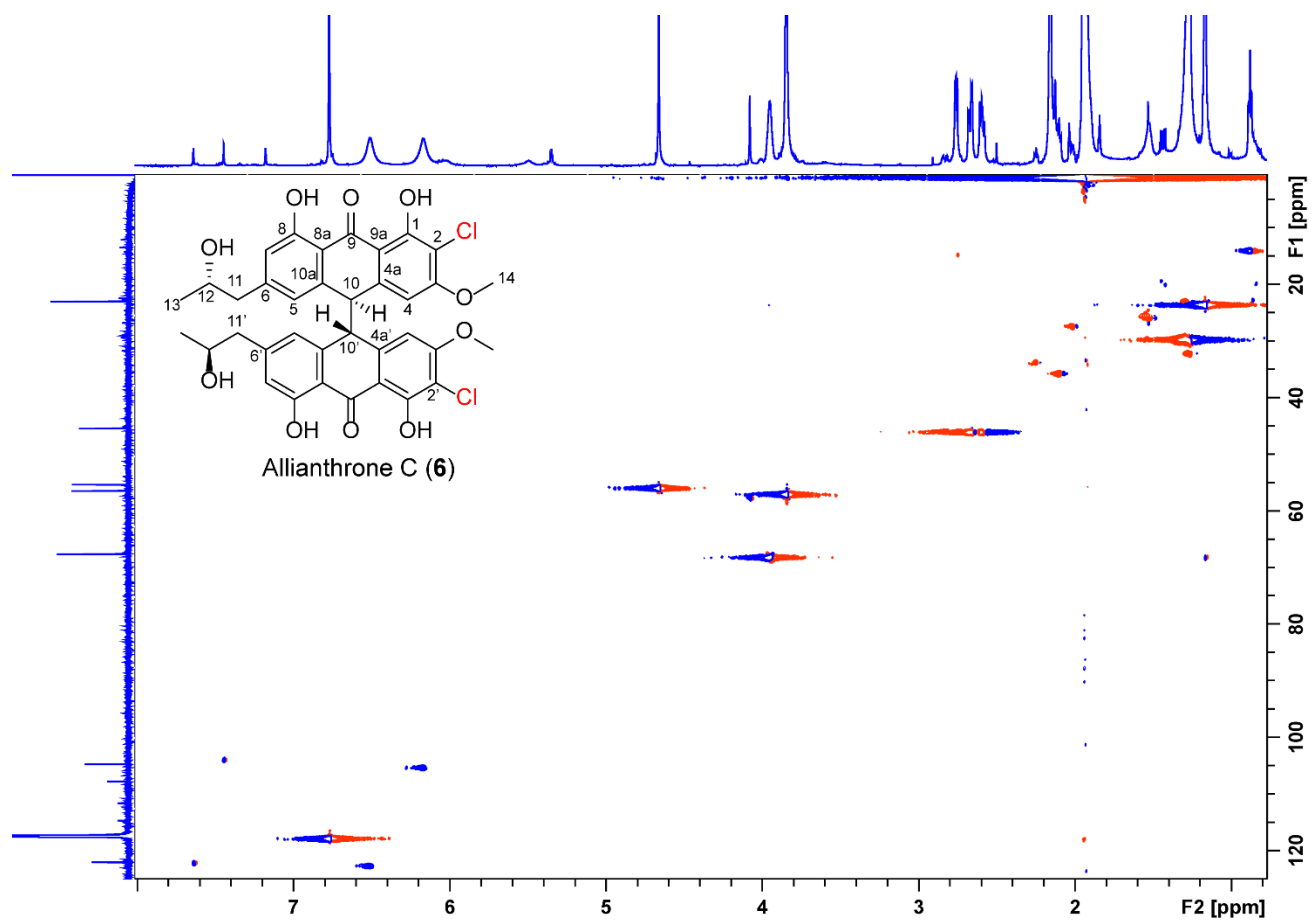

**Figure S31:**  $^1\text{H}$ - $^{13}\text{C}$  HSQC NMR spectrum of compound **6** in acetonitrile- $d_3$  at 700 MHz and 176 MHz

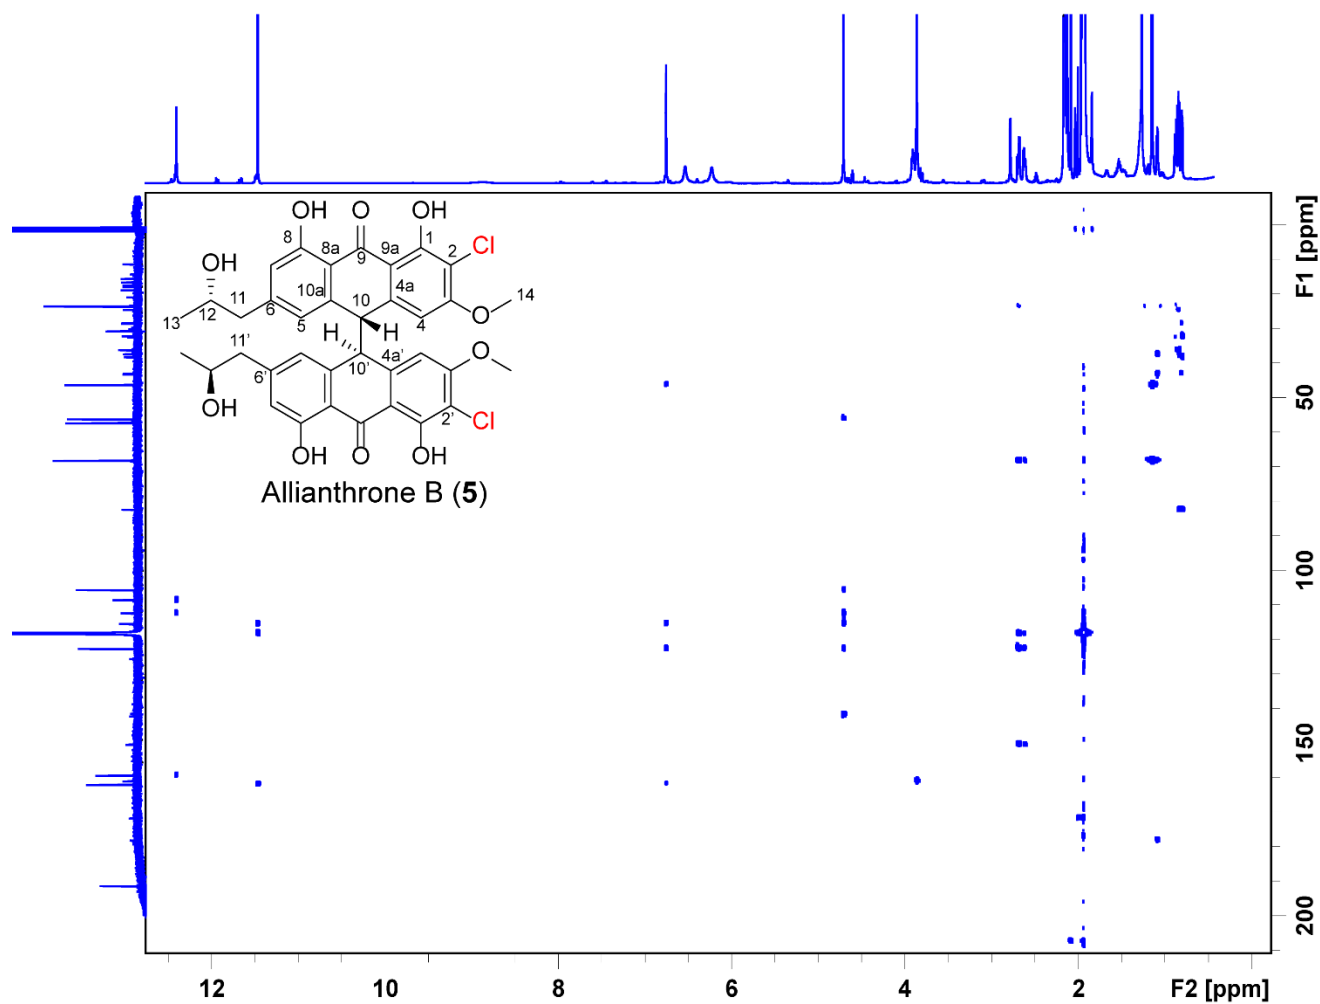

**Figure S32:**  $^1\text{H}$ - $^{13}\text{C}$  HMBC, 4 Hz optimized NMR spectrum of compound **5** in acetonitrile- $d_3$  at 700 MHz and 176 MHz

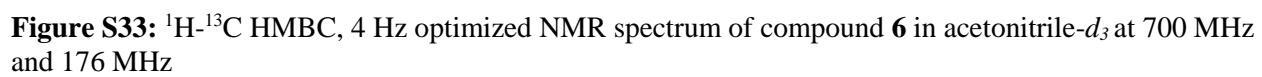

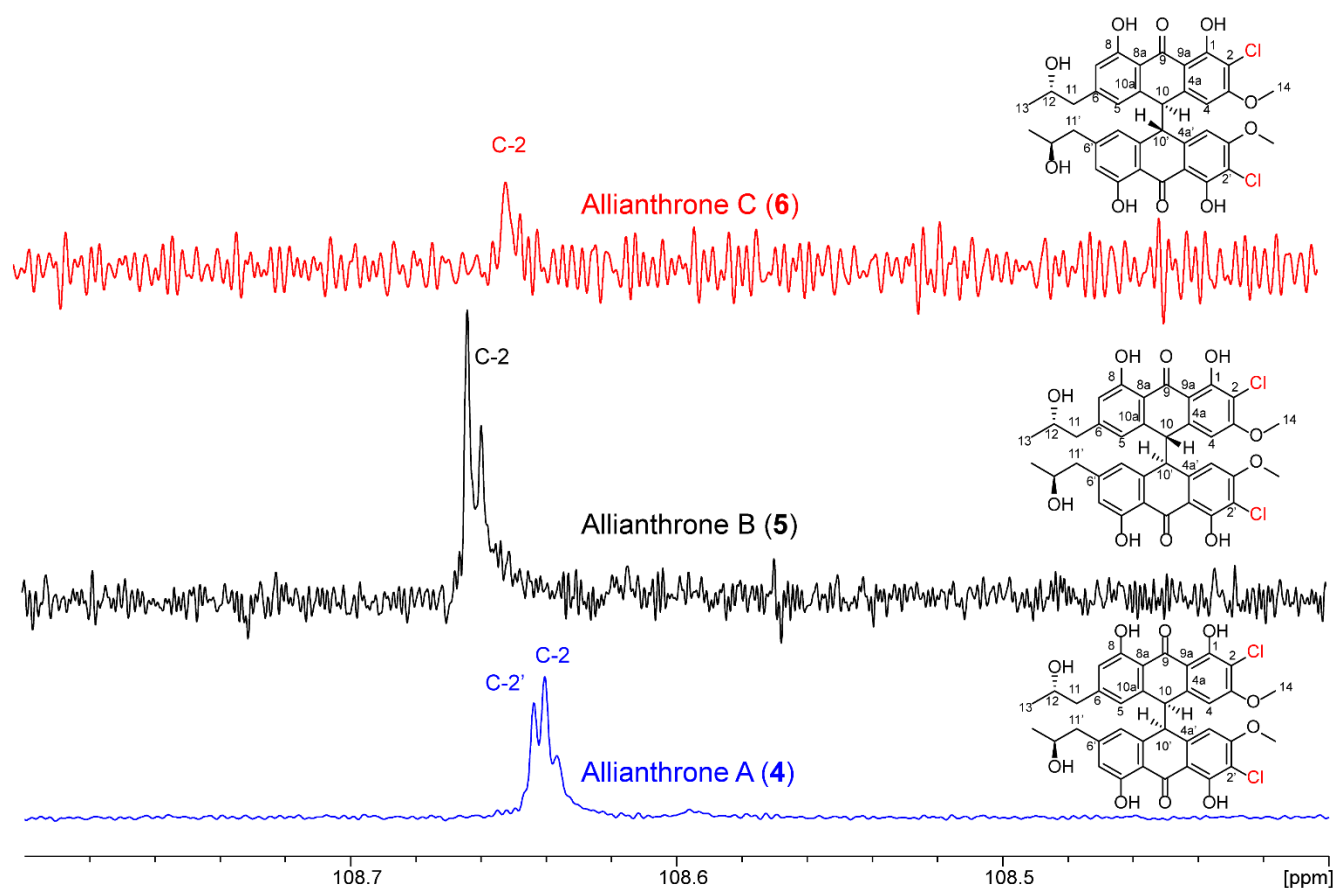

**Figure S34:** Ultra-high resolution  $^{13}\text{C}$  NMR of compounds **4**, **5**, and **6** in acetonitrile- $d_3$  with  $^{37}\text{Cl}/^{35}\text{Cl}$  isotope shifts evident in the C-2 carbon signal. **4** exhibits non-chemical equivalence between the anthronyl rings, and thus exhibits two chlorine isotope effects for C-2 and C-2', while **5** and **6** are have chemically equivalent anthronyl rings and exhibit a single C-2 singlet with a Cl isotope shift.

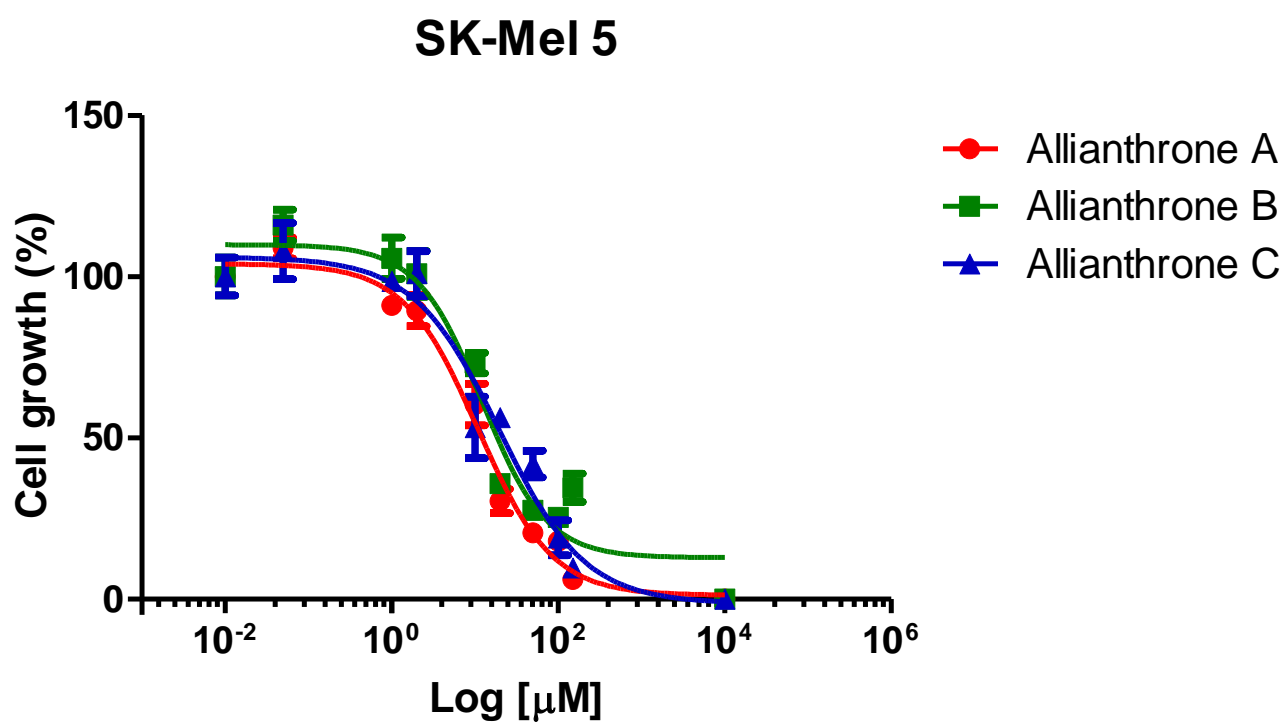

Figure S35: IC<sub>50</sub> curve of compounds 4-6 against SK-Mel 5

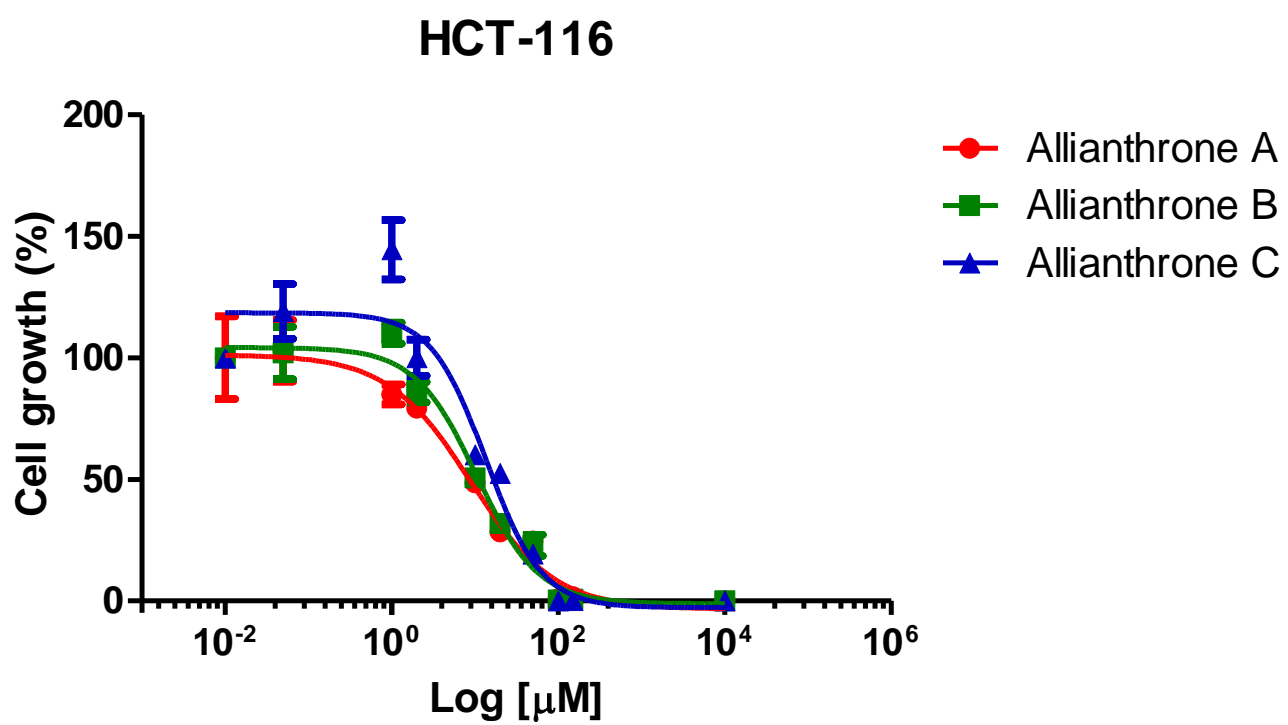

**Figure S36:** IC<sub>50</sub> curve of compounds **4-6** against HCT-116



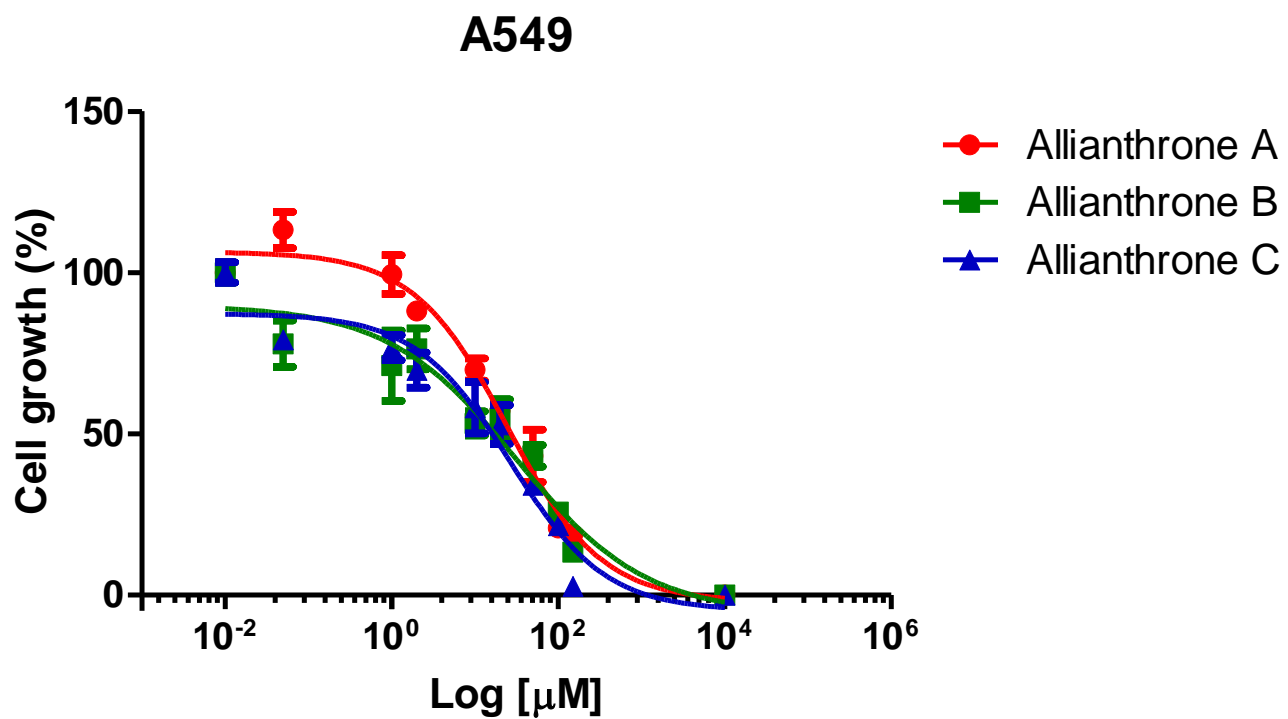

Figure S37: IC<sub>50</sub> curve of compounds 4-6 against A549

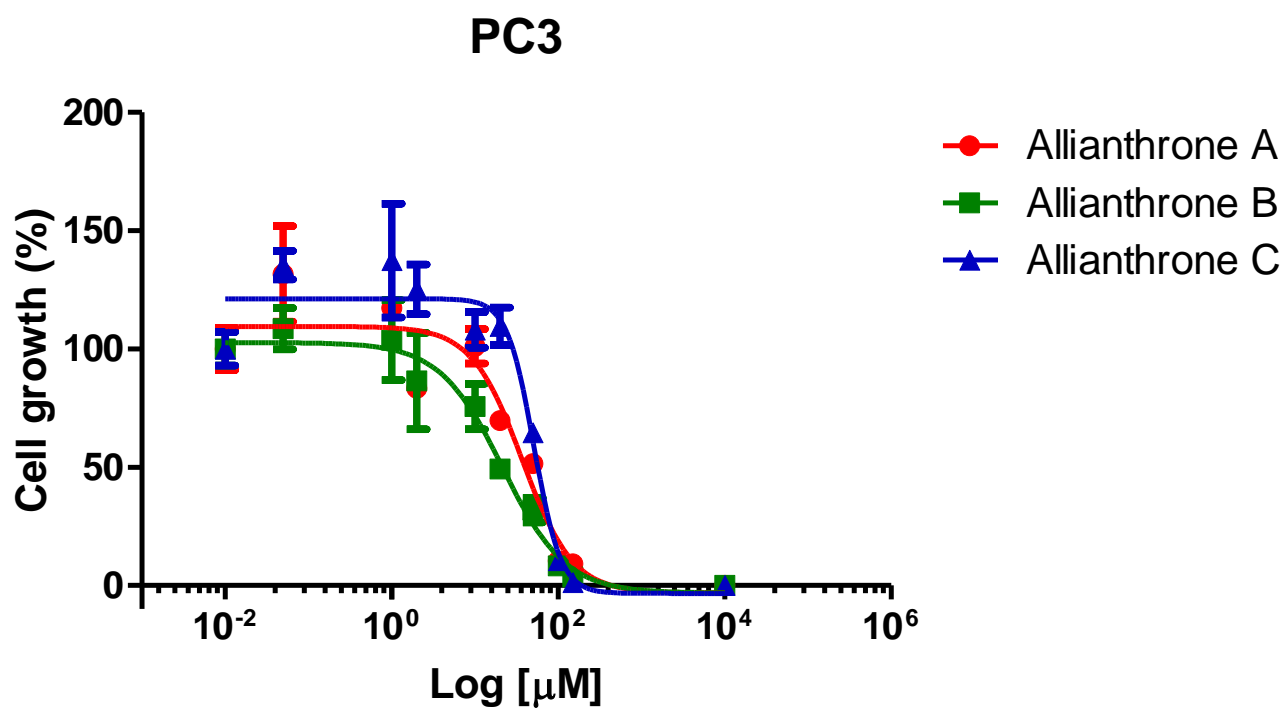

**Figure S38:** IC<sub>50</sub> curve of compounds 4-6 against PC3

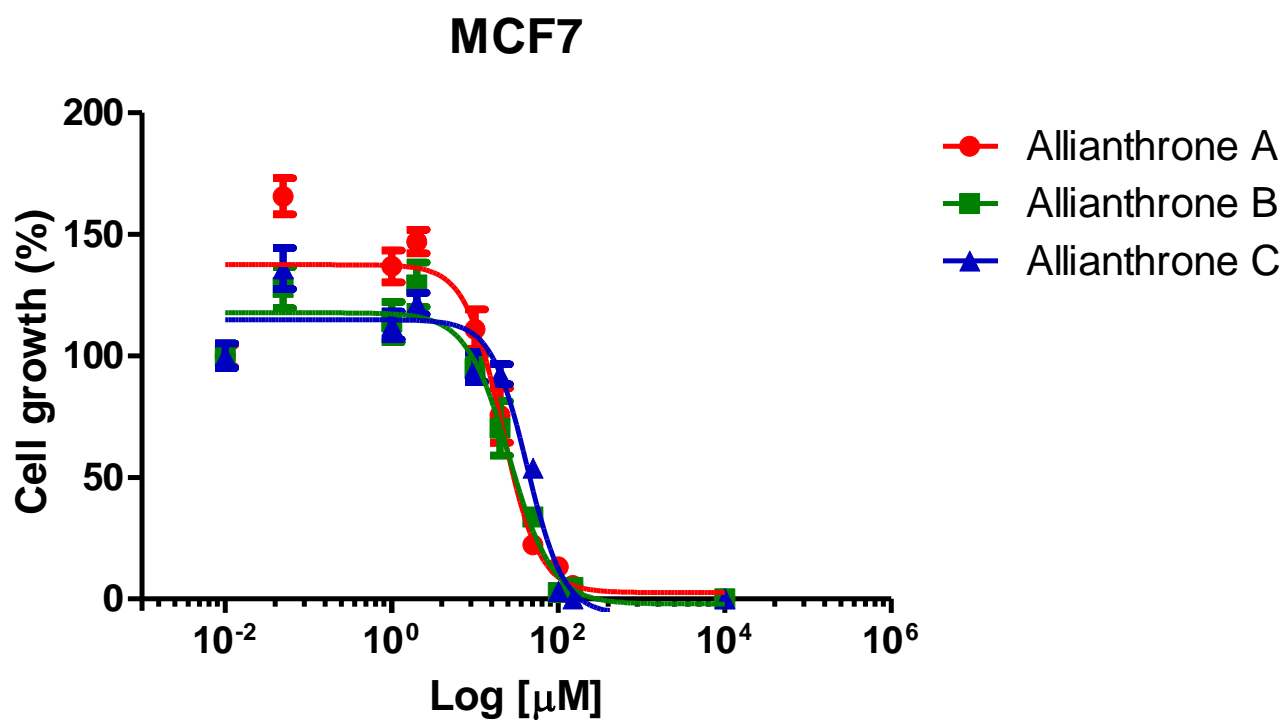

**Figure S39:** IC<sub>50</sub> curve of compounds **4-6** against MCF7

**Figure S40:** Antimicrobial single-dose microbroth assay with nalgiovensin (20.5 µg/mL), nalgiolaxin (22.7 µg/mL), and allianthrones A-C (43.5 µg/mL). Control antibiotic (125 µg/mL) used: chloramphenicol (*Bacillus subtilis* ATCC 49343), ampicillin (*Escherichia coli* ATCC 8739), kanamycin (*Pseudomonas aeruginosa* (ATCC 15442), *Staphylococcus aureus* ATCC 25923), vancomycin (*Enterococcus faecium* ATCC 49032), and amphotericin B (*Candida albicans* ATCC 90027). Ethanol was used as the negative control at 1.25 %v/v.

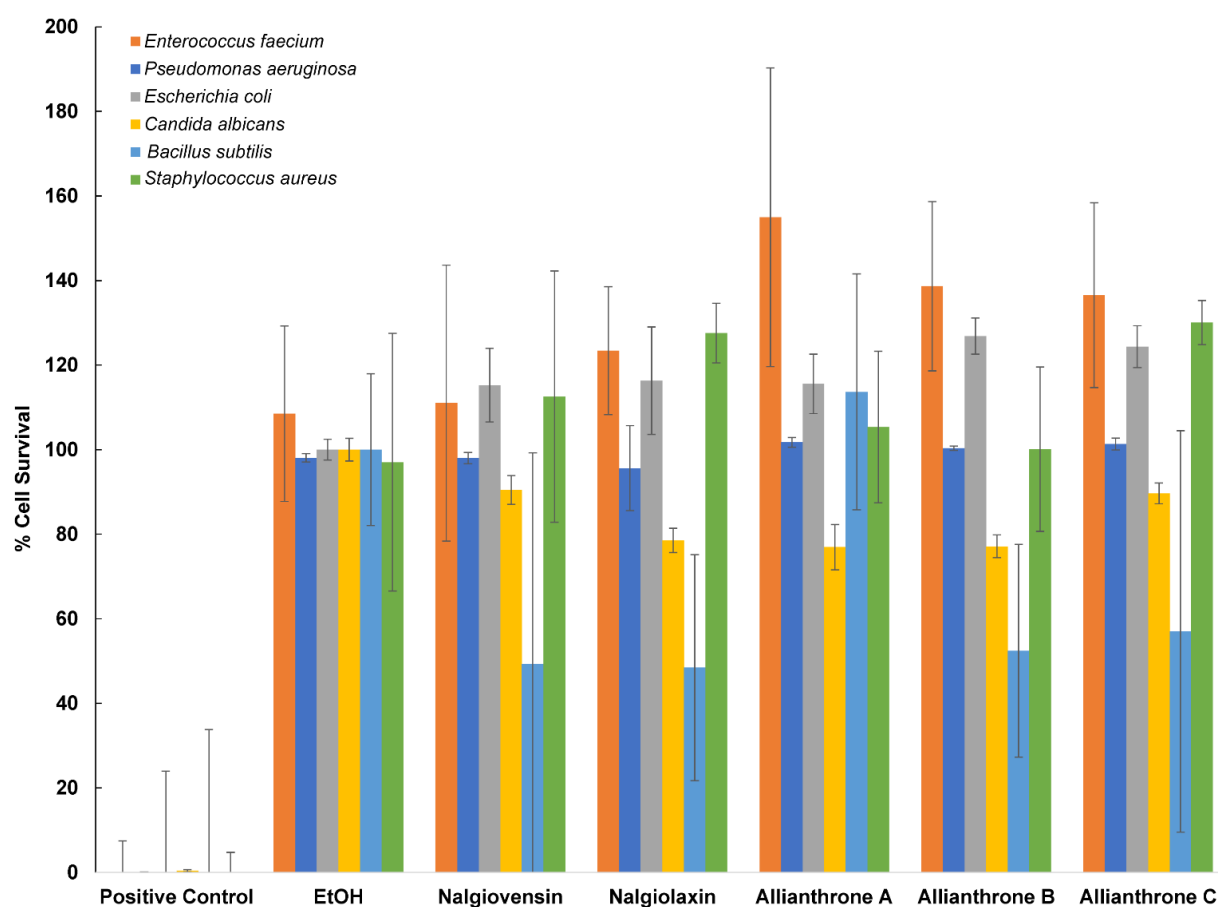

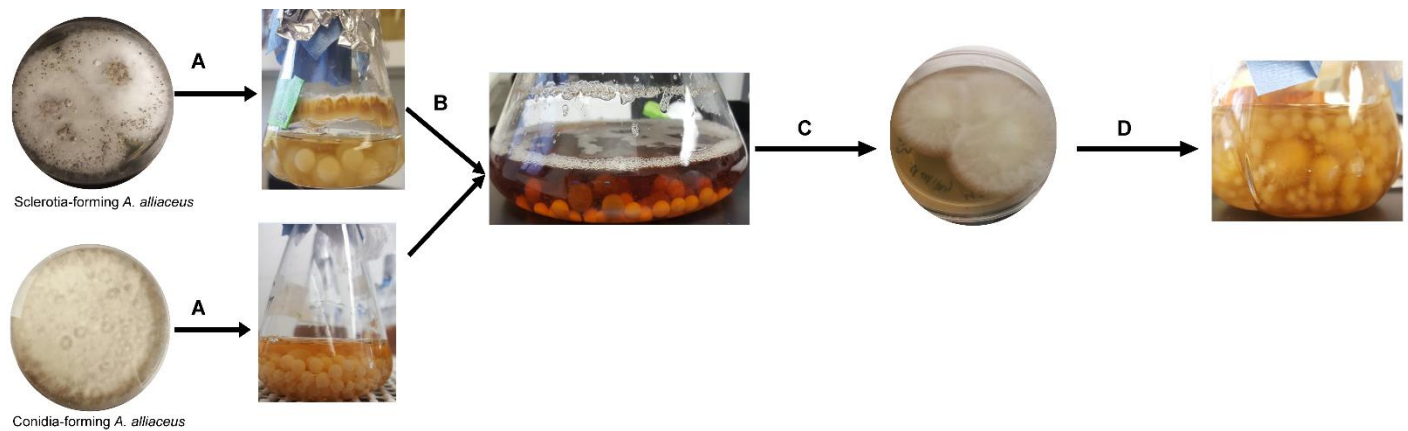

**Figure S41:** A) Sclerotia-forming and conidia-forming phenotype of *A. alliaceus* on agar plates were propagated into malt-based broth media and grown for 14 days in separate flasks. B) After 14 days of growth, the mycelia from each flask were combined into a single flask containing buffered-malt broth and placed on a 200 rpm shaker at ambient light and temperature for 15-20 days. C) Before extraction, the flask of combined mycelia was streaked out and a phenotypic change was observed, different compared to either starting phenotypes. D) The metabolically activated *A. alliaceus* was propagated into another flask containing buffered-malt broth and grown for 15-20 days.

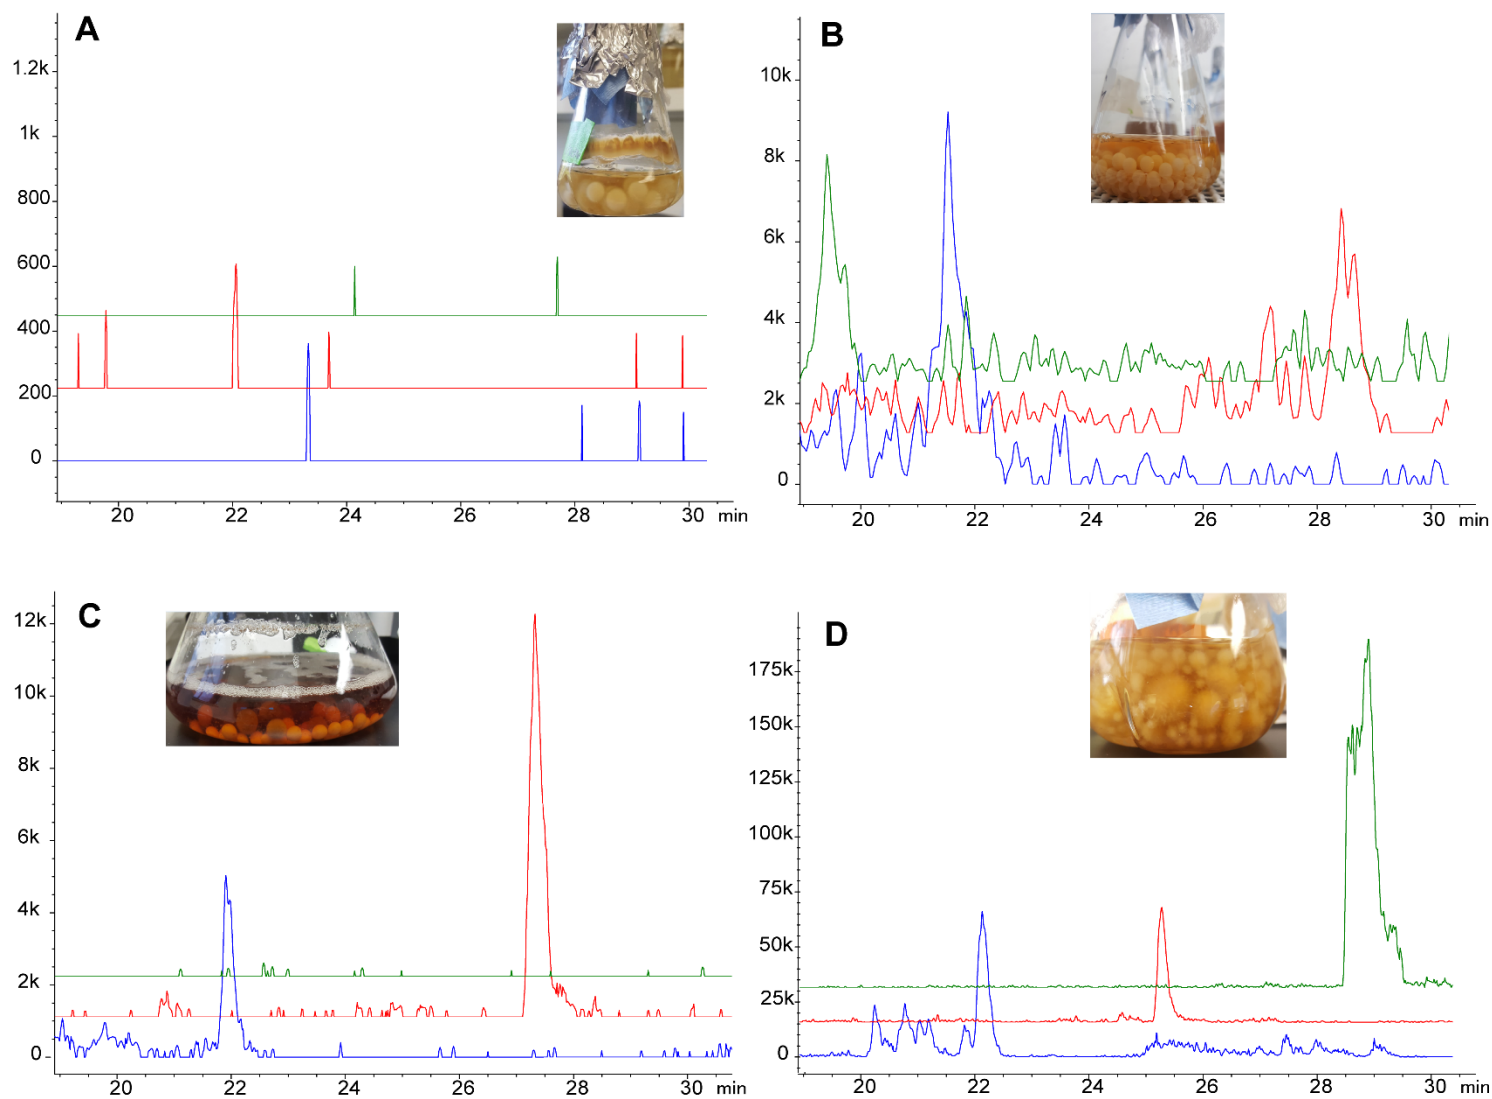

**Figure S42:** Extracted ion chromatographs at day 15 of culture to detect compounds **2** (blue), **3** (red), and **4-6** (green) in A) sclerotia-forming *A. alliaceus*, B) conidia-forming *A. alliaceus*, C) combined hyphae of sclerotia-forming and conidia-forming *A. alliaceus*, and D) coculture induced phenotype. Bianthrone formation is only observed after coculture activation

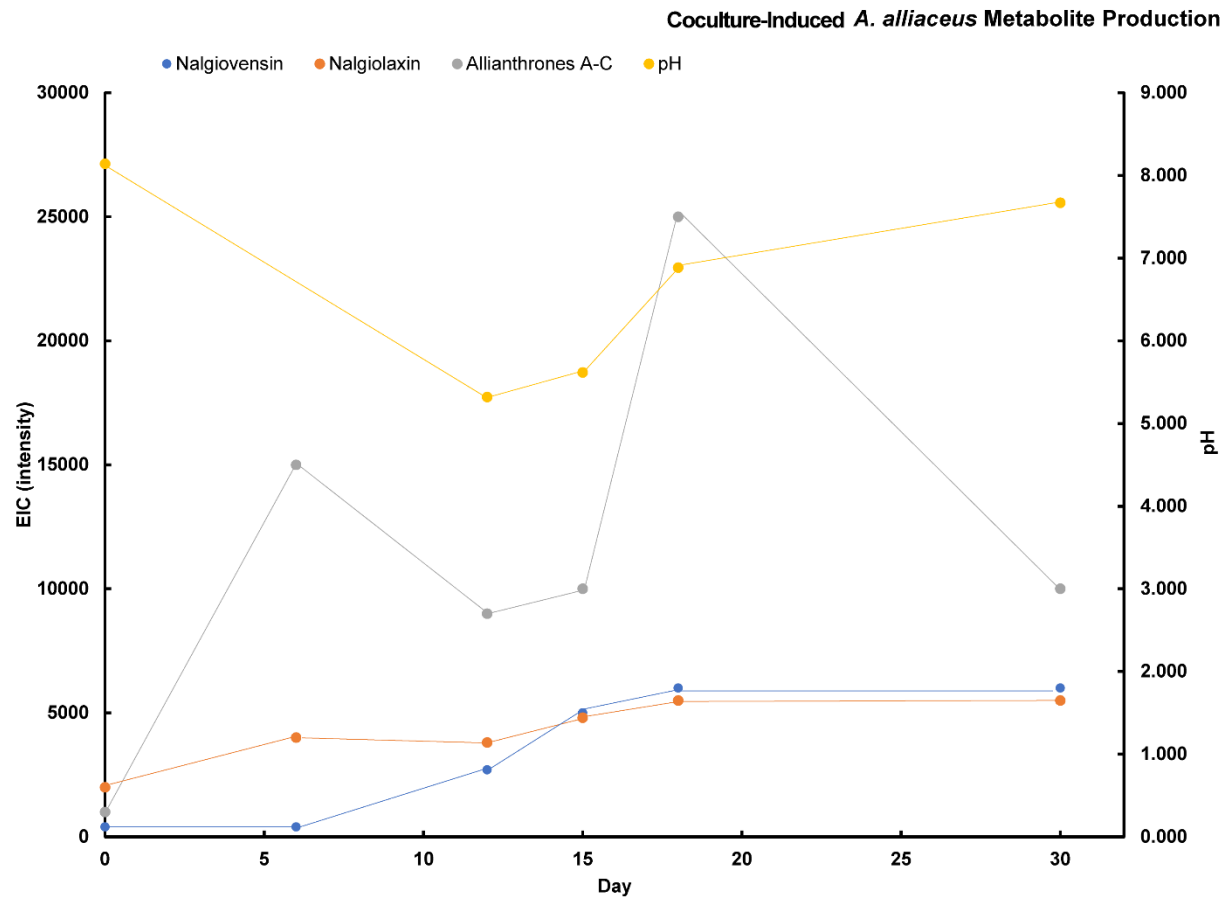

**Figure S43:** Production of **2-6** from phenotype coculture induced *Aspergillus alliaceus* monitored by extracted ion chromatography LCMS. Bianthrone production (gray) peaks around day 20, pH of the culture is also presented in yellow.

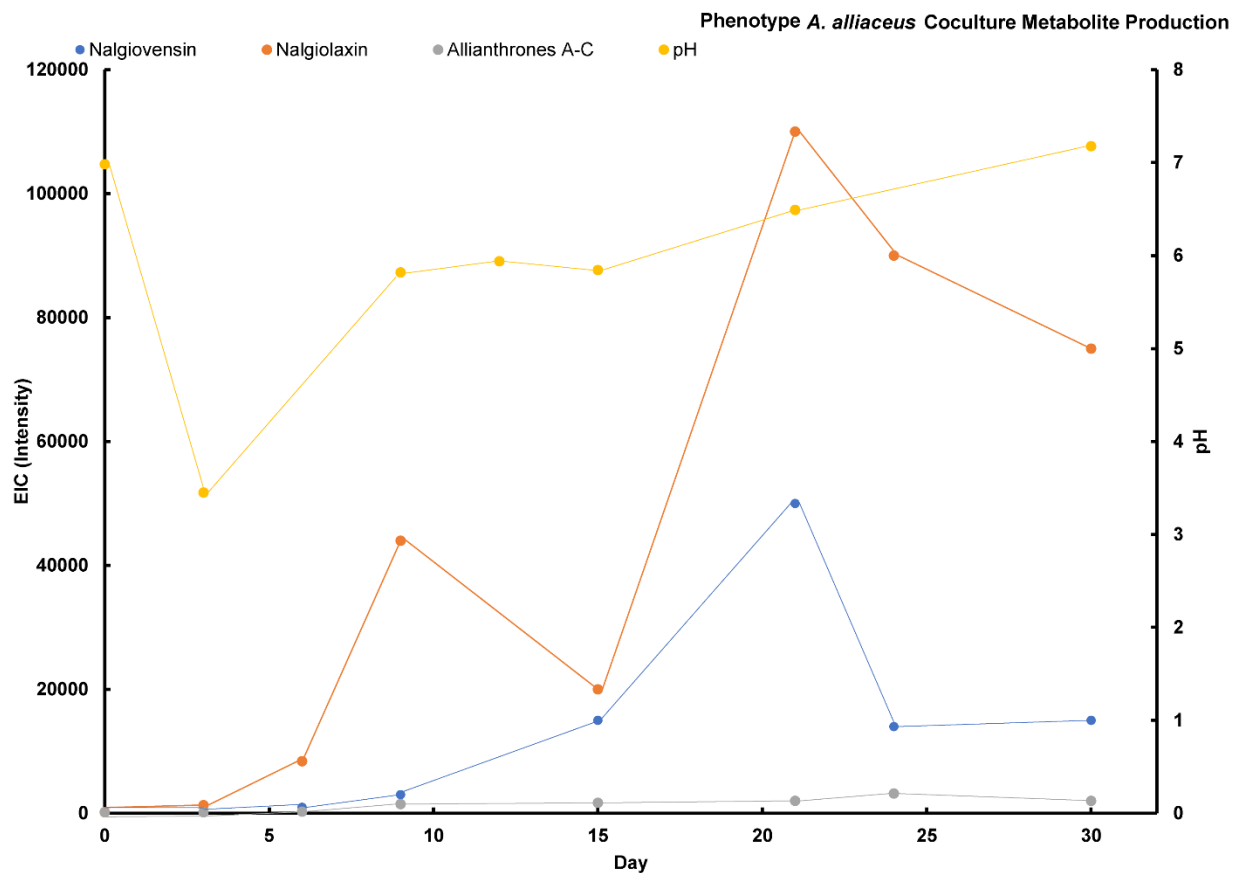

**Figure S44:** Production of **2-6** in a fresh initiated mixed culture of sclerotia-forming and conidia-forming *Aspergillus alliaceus* monitored by extracted ion chromatography LCMS. Bianthrone production (gray) is not observed in freshly combined fungal cultures. pH of the culture is presented in yellow.



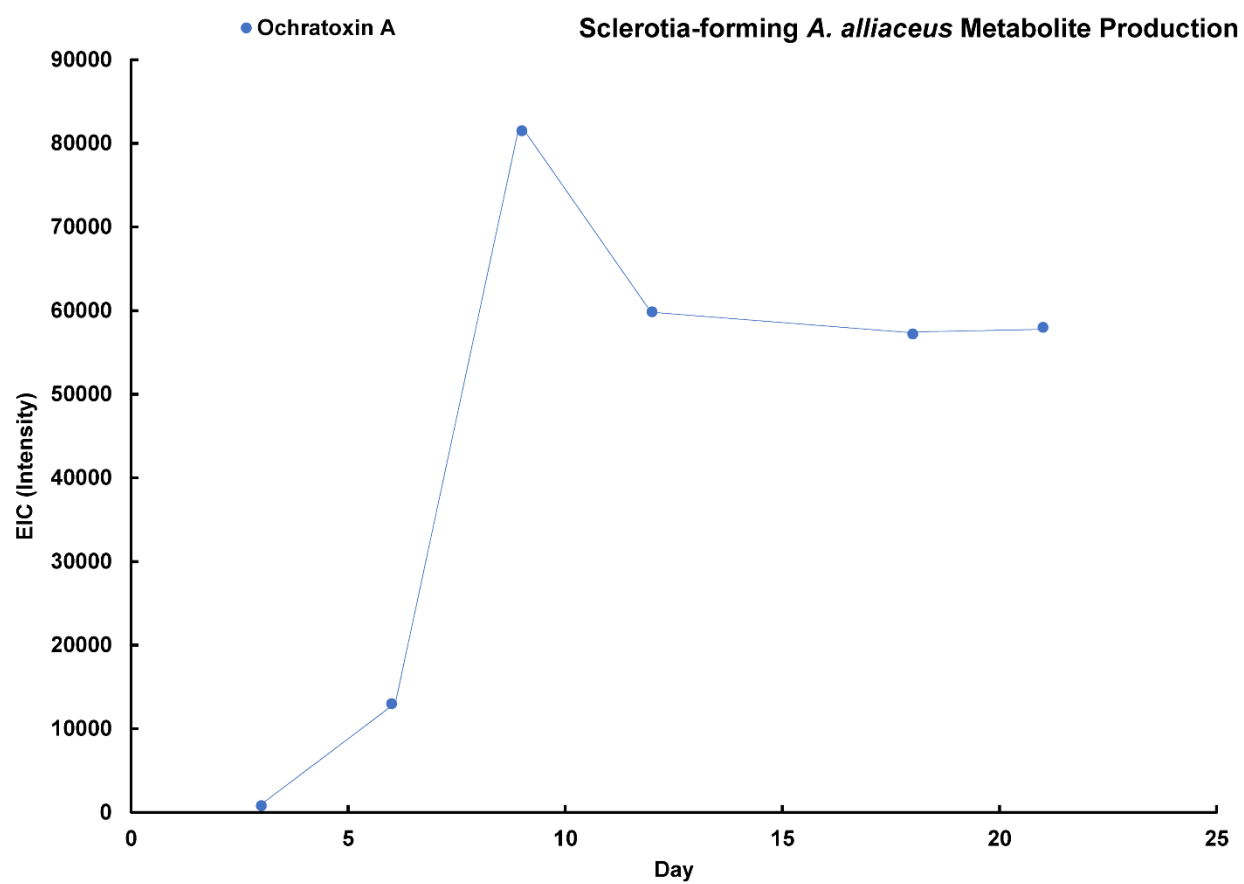

**Figure S45:** Production of **1** by sclerotia-forming *Aspergillus alliaceus* monitored by extracted ion chromatography LCMS.

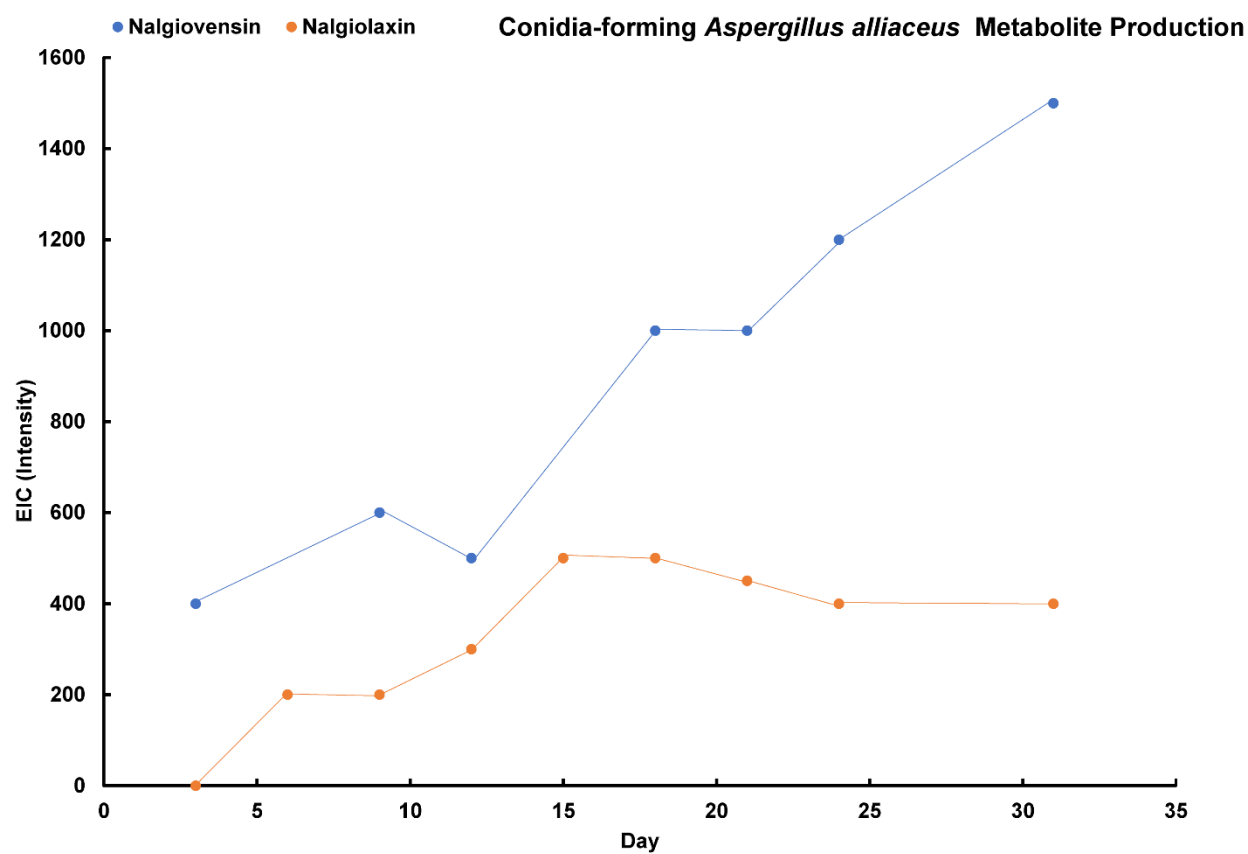

**Figure S46:** Production of **2** and **3** by conidia-forming *Aspergillus alliaceus* monitored by extracted ion chromatography LCMS.

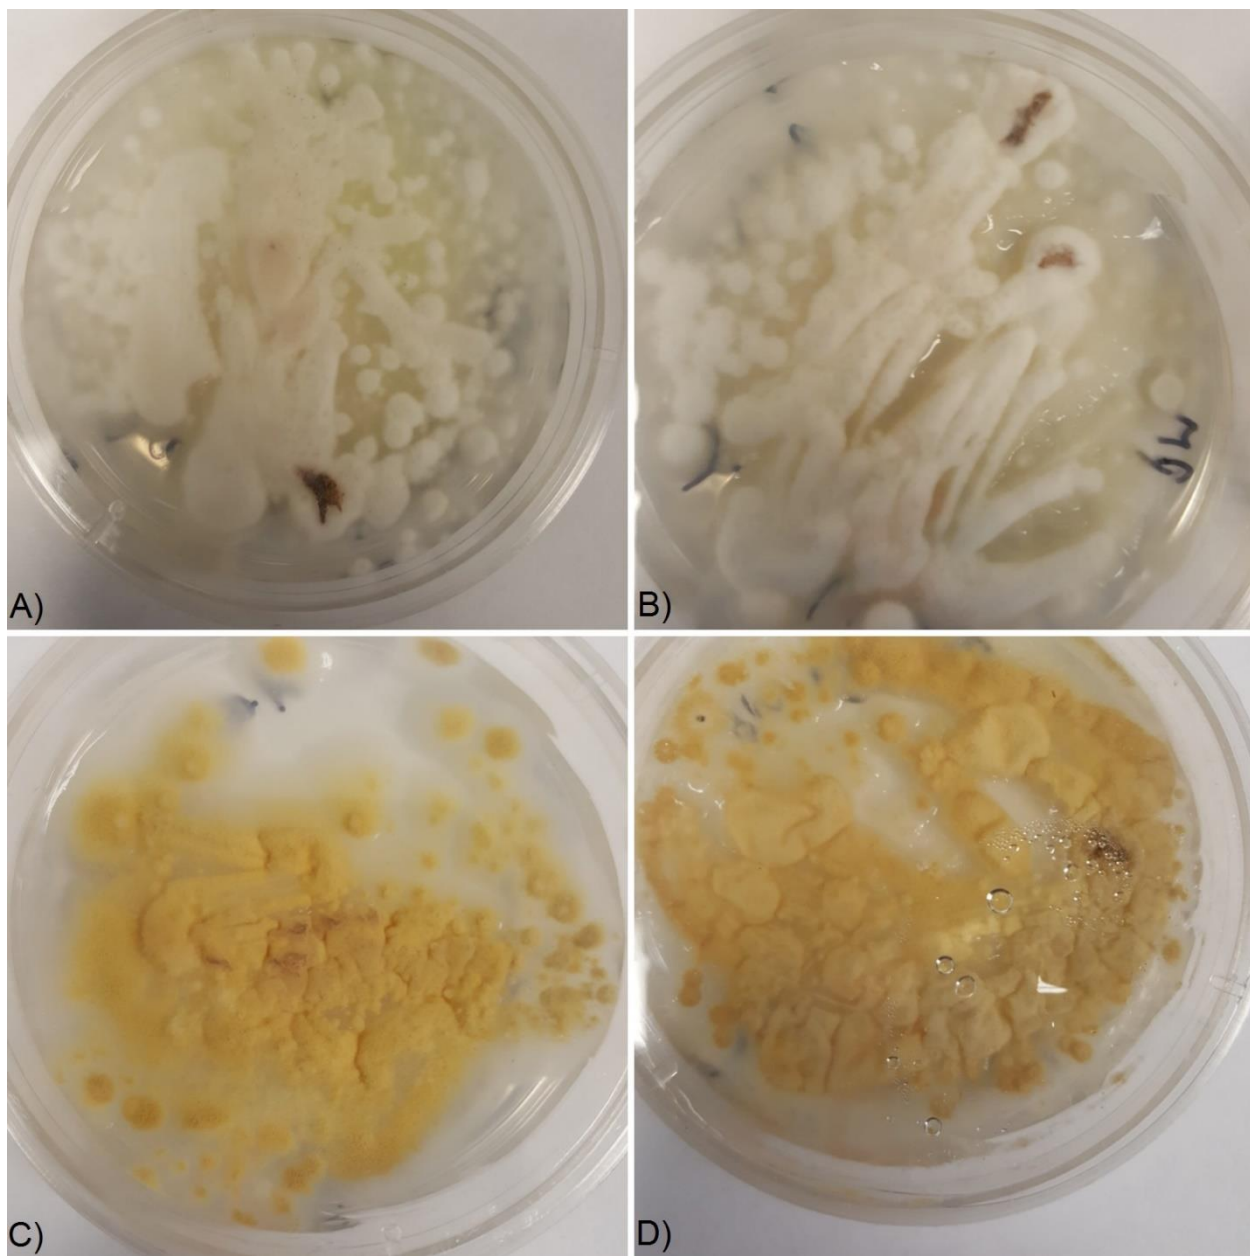

**Figure S47:** Conidia-forming *A. alliaceus* phenotype study on Czapek-Dox agar under A) no light, 25°C, B) light, 25°C, C) no light, 37°C and D) light, 37°C with photos taken between five and seven days of growth.

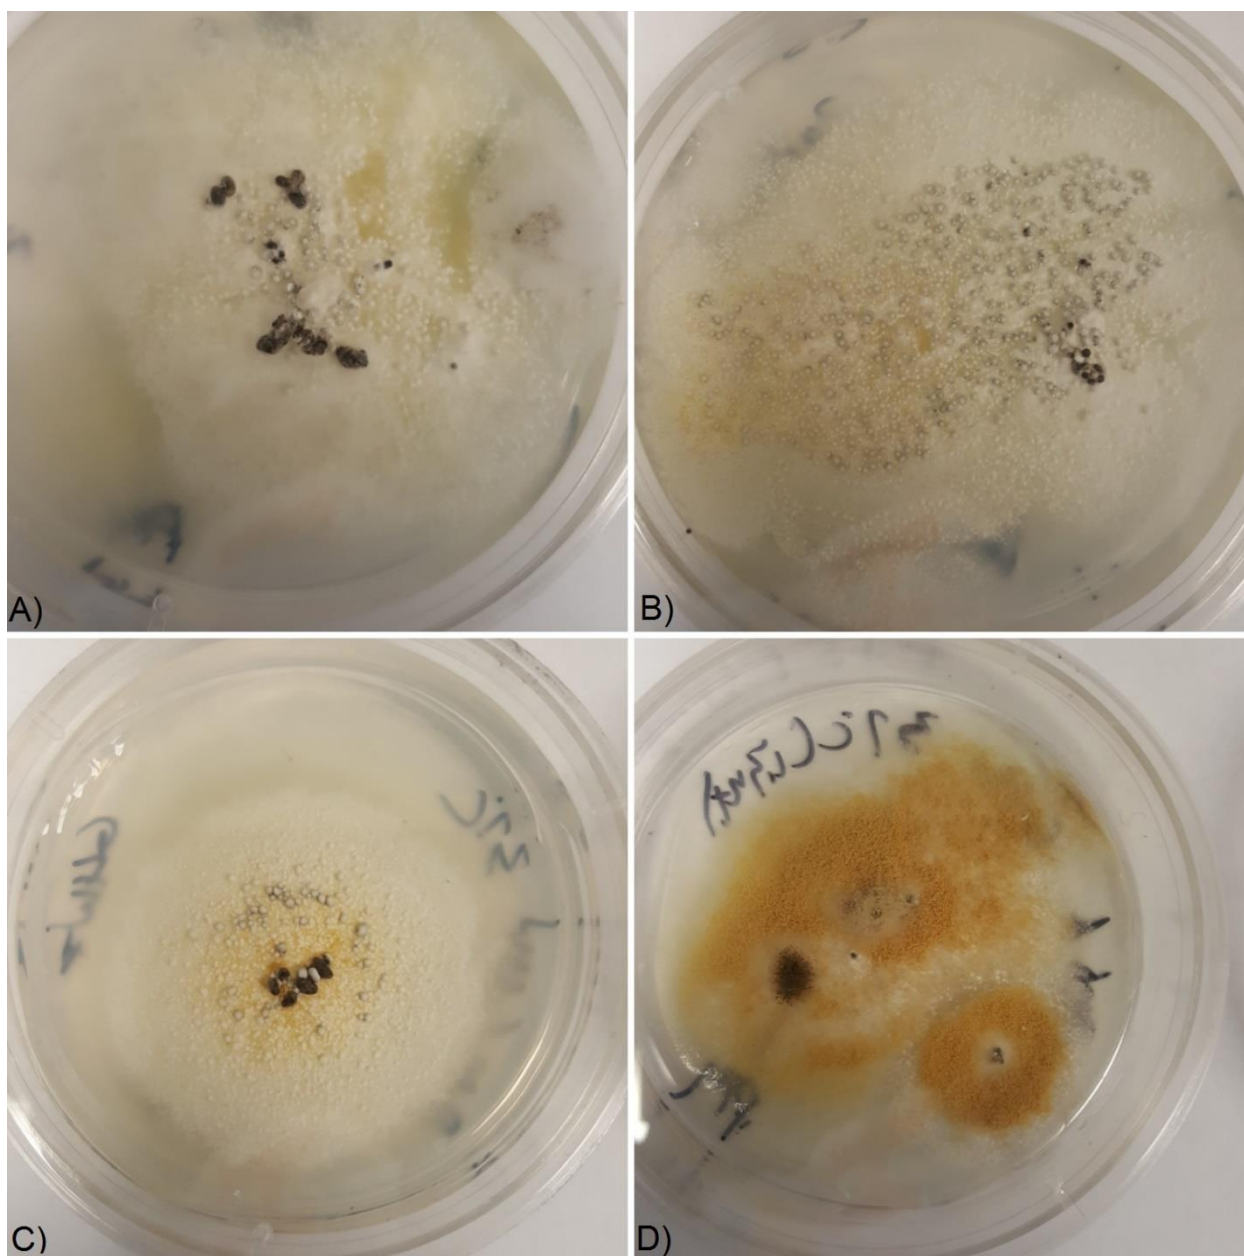

**Figure S48:** Sclerotia-forming *A. alliaceus* phenotype study on Czapek-Dox agar under A) no light, 25°C, B) light, 25°C, C) no light, 37°C and D) light, 37°C with pictures taken between five and seven days of growth.

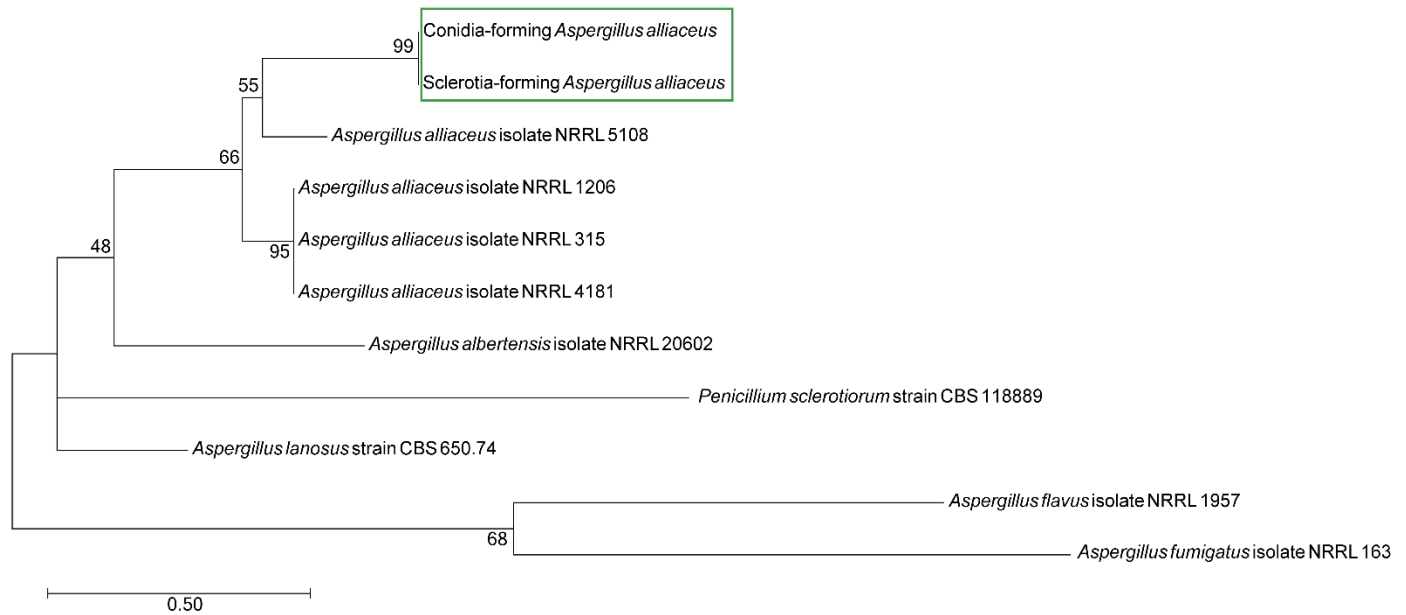

**Figure S49:** Molecular phylogenetic analysis of the total loci (Beta-Tubulin Bt2a/Bt2b, Calmodulin CF1M/CF4, and Internal Transcribed Spacer ITS5/4 and ITS1/4) of the *Aspergillus alliaceus* phenotypes by Maximum Likelihood method. The evolutionary history was inferred by using the Maximum Likelihood method based on the Tamura-Nei model.<sup>1</sup> The tree with the highest log likelihood (-11779.1611) is shown. The percentage of trees in which the associated taxa clustered together is shown next to the branches. Initial tree(s) for the heuristic search were obtained automatically by applying Neighbor-Join and BioNJ algorithms to a matrix of pairwise distances estimated using the Maximum Composite Likelihood (MCL) approach, and then selecting the topology with superior log likelihood value. The tree is drawn to scale, with branch lengths measured in the number of substitutions per site. The analysis involved 11 nucleotide sequences. All positions with less than 95% site coverage were eliminated. That is, fewer than 5% alignment gaps, missing data, and ambiguous bases were allowed at any position. There were a total of 1243 positions in the final dataset. Evolutionary analyses were conducted in MEGA7.<sup>2</sup> *A. alliaceus* strains NRRL 315, 5108, and 4181 are referred to as the *Petromyces alliaceus*<sup>3</sup> and *A. alliaceus* strain NRRL 1206 is referred to as *Aspergillus alliaceus*<sup>4</sup>.

GATCCCTACCGA-  
 TGCATGGGATCTAATGCGTCCCATTACTTCTGCCACGTGTTTGCTAACGGTTTTACAGGCAGAC  
 CCATTTCTGGCGAGCACGGCCTTGACGGCTCCGGTGTGTAAGTACAACCCGTGTACA--  
 TCTCGAACGAAGGACAATCCGTTGG-CGATGGAAGGGTCTGAAAGGG-  
 TCTGACGGGAAGGATAGTTACAATGGCTCCTCCGACCTCCAGCTGGAGCGCATGAACGTCTA  
 CTTCAACGAGGTGCGTACCTCAGATTTTGCAGCCTCCCTAGAAACGCCGTGCAGGCCCTGAC  
 C—  
 ACTTCTCCAGGCTAGTGGAACAAGTATGTTCTCGTGCCGTCTCGTCGATCTTGAGCCCG  
 GTACCATGGACGCCGTCCGCGCAGGTCCCTTANGTCAGCTTTTCCGTCCCGACAACCTTCGTG  
 ATGGTCTTGGTGGAATGCATACTGACTTGAGTTTTCTTGGGCTCCTAATAGGACAAGGATGG  
 TGATGGTTAGTACATCATGTTCCATAAAACCCCTTCTAGTGCGACCGACAGTTTTTCAGCCC  
 CTATAATCGTCTCCATATTTTTTATTGTTTCGATCGGCTGAAGTCTTGGCGTTGATAAATTGAC  
 TCGATATGCAGGCCAGATCACCACCAAGGAGTTGGGCACTGTGATGCGCTCTCTGGGCCAGA  
 ACCTTCTGAGTCGGAACCTCAGGATATGATCAACGAGGTTGATGCCGATAACAATGGCACC  
 ATCGACTTCCCTGGTACGCGAGGGCTTTCCTACGGCTCACAGACAAAGAAATTCTATTAACG  
 TTCGATTAGAGTTCCTTACGATGATGGCCAGAAAGATGAAGGATACCGACTCTGAGGAGGA  
 GATCCGGGAGGCTTTCAAGGTTTTTCGACCGTGATAACAACGGCTTTATCTCCGCCGCGGAGC  
 TGCGCCACGTCATGACCTCCATCGGTGAGAACTTACCGATGATGAAGTTGATGAGATGATC  
 CGCGAGGCGGATCAGGACGGTGTGATGGCCGGATCGATTGTACGTTGAGAACAACCTCCCCATT  
 CTTTTACCCGCTGAGGATGAATGTGGATGTGAACCAACCTCCACCCGTGTATACTGTACCTT  
 CGTTGCTTCGGCGGGCCCGCCGTCATGGCCGCCGGGGGGCTTCTGCCCC-  
 CGGGCCCGCGCCCGCCGGAGACACATGAACTCTGTCTG-ATGTAGTGAAGTCTGAGTTG-  
 ATTGTCACACAATCAGTTAAACTTTCA----  
 ACAATGGATCTCTTGGTTCCGGCATCGATGAAGAACGCAGCGAAATGCGATAACTAATGTG  
 AATTGCAGAATTCCGTGAATCATCGAGTCTTTGAACGCACATTGCGCCCCCTGGTATTCCGG  
 GGGGCATGCCTGTCCGAGCGTCATTGCTGCCCATCAAGCACGGCTTGTGTGTTGGGTCCTCG  
 TCCCCCCCCGGGGG-ACGTGCCCCGAAAGGCAGCGGCGGCACCGCGTCCG-  
 GTCCTCGAGCGTATGGGGCTTTGTCACCCGCTCTGCAGGCCCGGCCGGCGCTGGCCGACGCG  
 AAAG

**Figure S50:** Conidia-forming *Aspergillus alliaceus* consensus sequence (1545 bp) of Beta-tubulins (black letters), Calmodulin (blue letters), and ITS region (green letters)

GATCCCTACCGA-  
 TGCATGGGATCTAATGCGTCCCATTACTTCTGCCACGTGTTTGCTAACGGTTTTACAGGCAGAC  
 CCATTTCTGGCGAGCACGGCCTTGACGGCTCCGGTGTGTAAGTACAACCCGTGTACA--  
 TCTCGAACGAAGGACAATCCGTTGG-CGATGGAAGGGTCTGAAAGGG-  
 TCTGACGGGAAGGATAGTTACAATGGCTCCTCCGACCTCCAGCTGGAGCGCATGAACGTCTA  
 CTTCAACGAGGTGCGTACCTCAGATTTTGCAGCCTCCCTAGAAACGCCGTGCAGGCCCTGAC  
 C—  
 ACTTCTCCAGGCTAGTGGAACAAGTATGTTCTCGTGCCGTCTCGTCGATCTTGAGCCCG  
 GTACCATGGACGCCGTCCGCGCAGGTCCCTTCGGTCAGCTTTTCCGTCCCGACAACCTTCGTG  
 ATGGTCTTGGTGGAATGCATACTGACTTGAGTTTTCTTGGGCTCCTAATAGGACAAGGATGG  
 TGATGGTTAGTACATCATGTTCCATAAAACCCCCCTTCTAGTGCGACCGACAGTTTTTCAGCCC  
 CTATAATCGTCTCCATATTTTTTATTGTTTCGATCGGCTGAAGTCTTGGCGTTGATAAATTGAC  
 TCGATATGCAGGCCAGATCACCACCAAGGAGTTGGGCACTGTGATGCGCTCTCTGGGCCAGA  
 ACCTTCTGAGTCGGAACCTCAGGATATGATCAACGAGGTTGATGCCGATAACAATGGCACC  
 ATCGACTTCCCTGGTACGCGAGGGCTTTCCTACGGCTCACAGACAAAGAAATTCTATTAACG  
 TTCGATTAGAGTTCCTTACGATGATGGCCAGAAAGATGAAGGATACCGACTCTGAGGAGGA  
 GATCCGGGAGGCTTTCAAGGTTTTTCGACCGTGATAACAACGGCTTTATCTCCGCCGCGGAGC  
 TGCGCCACGTCATGACCTCCATCGGTGAGAACTTACCGATGATGAAGTTGATGAGATGATC  
 CGCGAGGCGGATCAGGACGGTGTGATGGCCGGATCGATTGTACGTTGAGAACAACCTCCCCATT  
 CTTTTACCCGCTGAGGATGAATGTGGATGTGAACCAACCTCCACCCGTGTATACTGTACCTT  
 CGTTGCTTCGGCGGGCCCCGCCGTCATGGCCGCCGGGGGGCTTCTGCCCC-  
 CGGGCCCGCGCCCGCCGGAGACACATGAACTCTGTCTG-ATGTAGTGAAGTCTGAGTTG-  
 ATTGTCACACAATCAGTTAAACCTTTCA----  
 ACAATGGATCTCTTGGTTCCGGCATCGATGAAGAACGCAGCGAAATGCGATAACTAATGTG  
 AATTGCAGAATTCCGTGAATCATCGAGTCTTTGAACGCACATTGCGCCCCCTGGTATTCCGG  
 GGGGCATGCCTGTCCGAGCGTCATTGCTGCCCATCAAGCACGGCTTGTGTGTTGGGTCCTCG  
 TCCCCCCCCGGGGG-ACGTGCCCCGAAAGGCAGCGGCGGCACCGCGTCCG-  
 GTCCTCGAGCGTATGGGGCTTTGTCACCCGCTCTGCAGGCCCGGCCGGCGCTGGCCGACGCG  
 AAAG

**Figure S51:** Sclerotia-forming *Aspergillus alliaceus* consensus sequence (1545 bp) of Beta-tubulins (black letters), Calmodulin (blue letters), and ITS region (green letters)

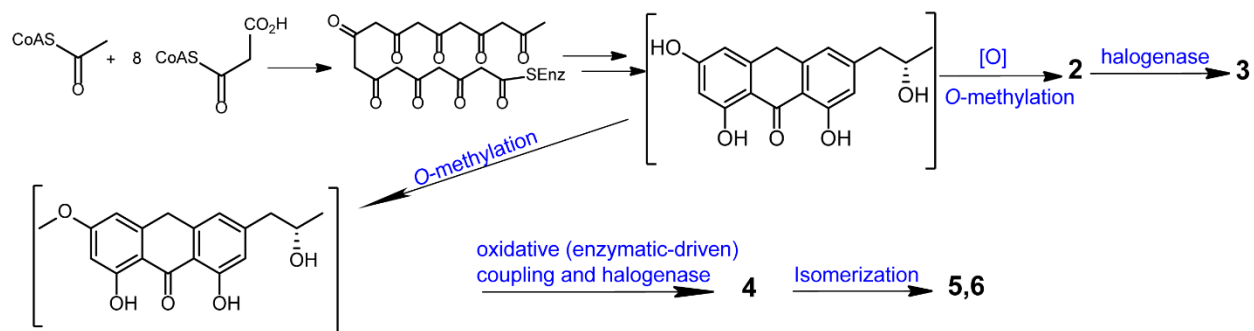

**Figure S52.** Abbreviated biosynthetic proposal of compounds **2-6**.



## References

- (1) Tamura, K.; Nei, M. *Mol. Biol. Evol.* **1993**, *10*, 512.
- (2) Kumar, S.; Stecher, G.; Tamura, K. *Mol. Biol. Evol.* **2016**.
- (3) McAlpin, C.; Wicklow, D. *Can. J. Microbiol.* **2005**, *51*, 1039-1044.
- (4) Peterson, S.W. *Mycologia* **2008**, *100*, 205-226.
